# Supplementary material
Source: Research Square preprint supplement (doi:10.21203/rs.3.rs-10028007/v1)

# Original Western Blot

## CoIP

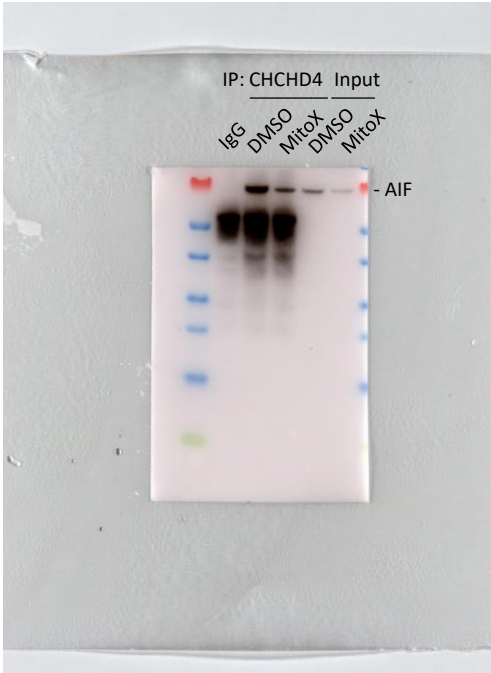

## SiRNA

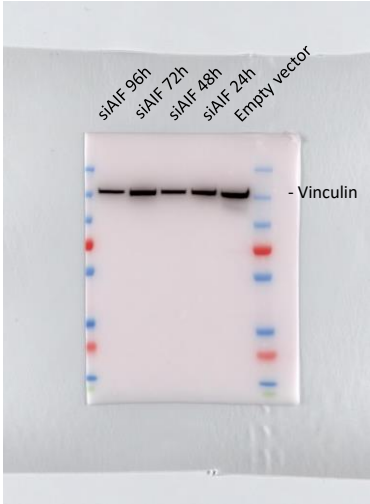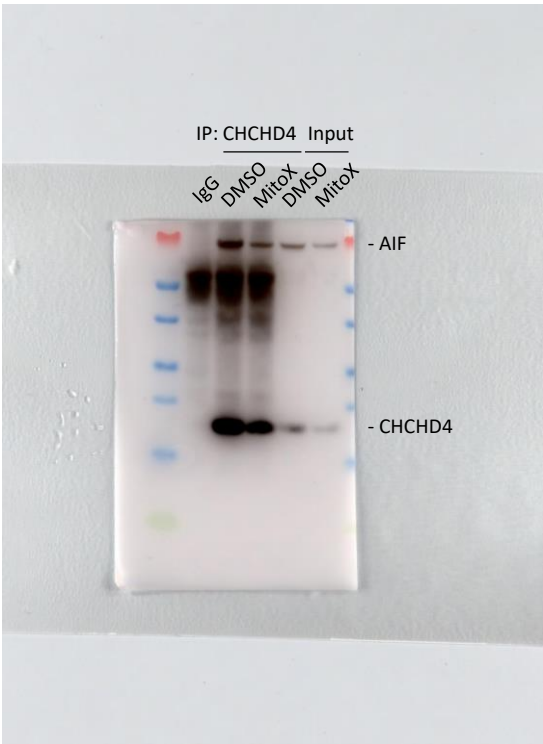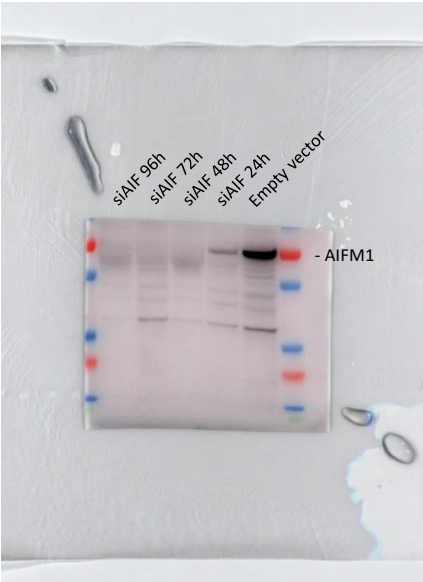

Original Western Blot

AIF/CHCHD4 substrates  
HOS cell line, replicate 1

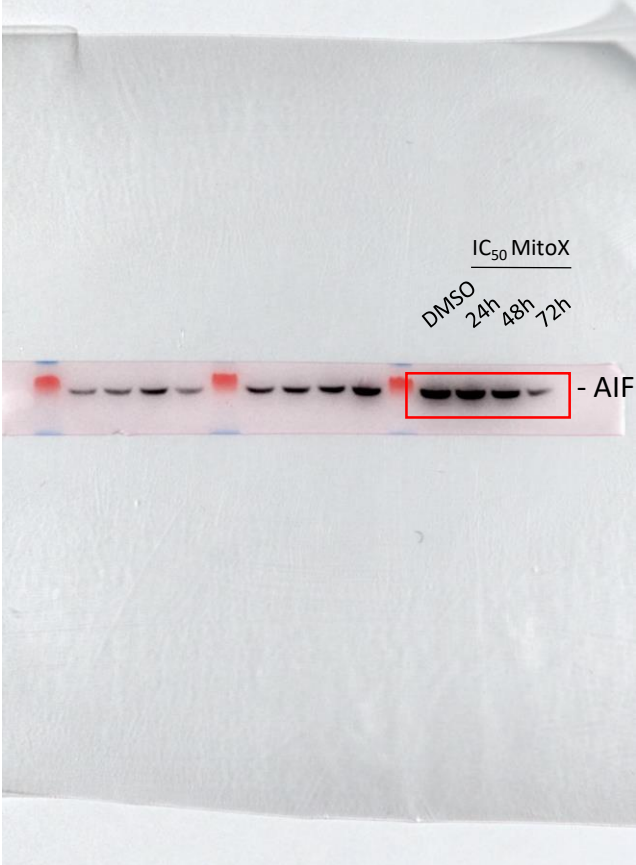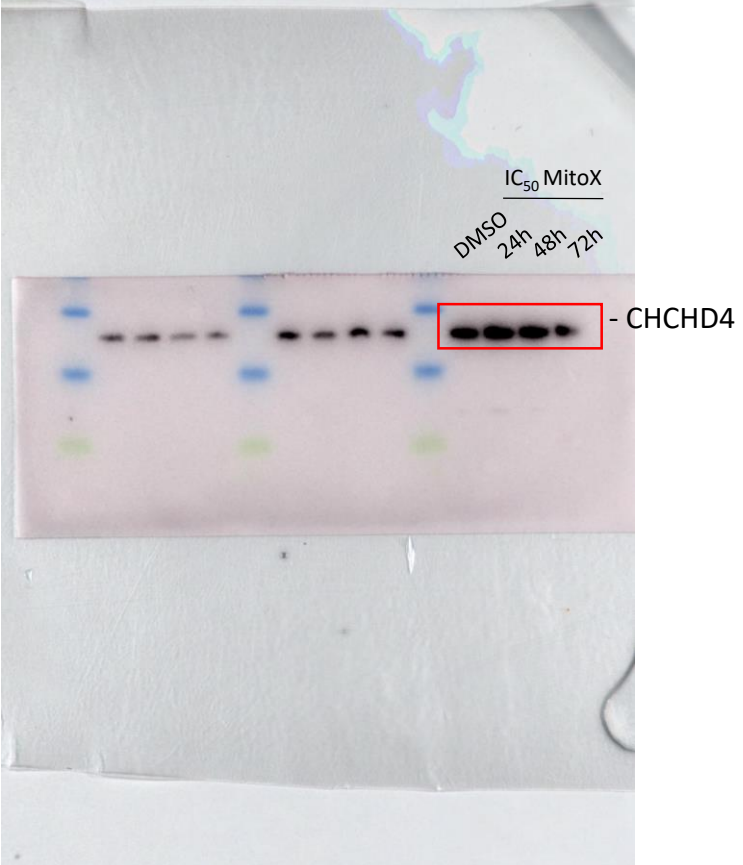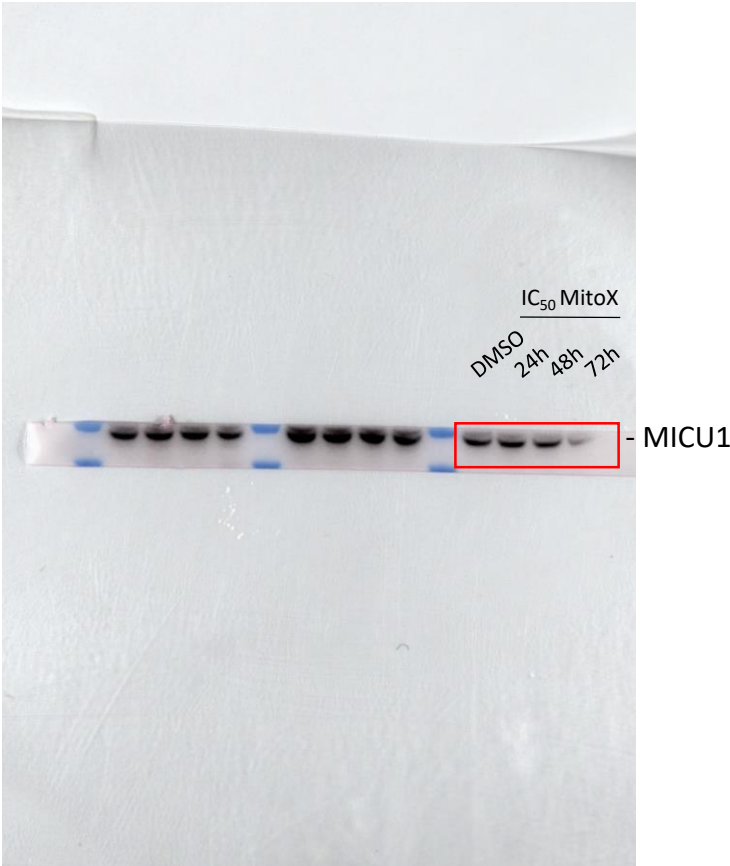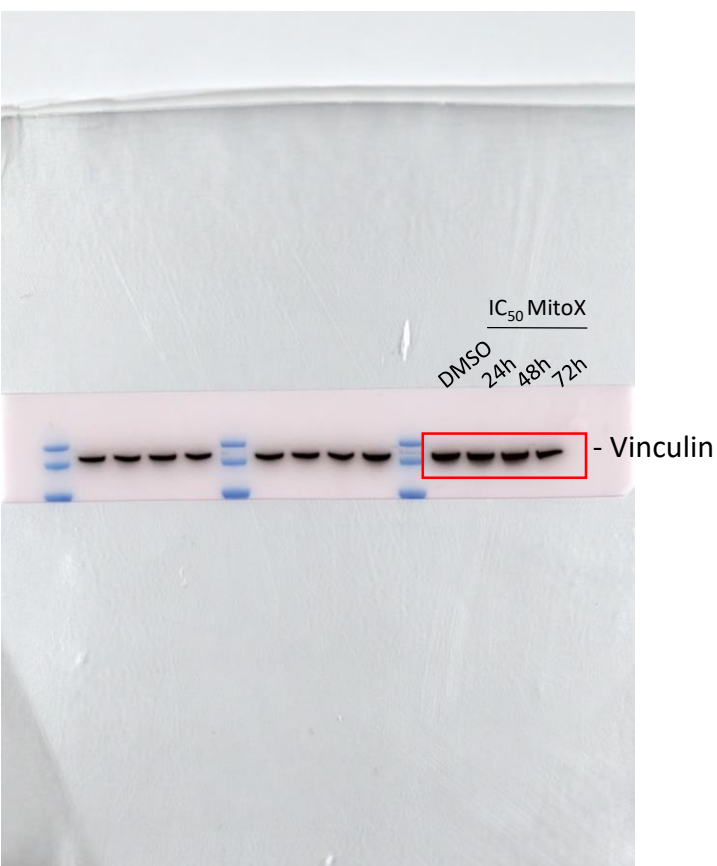

Original Western Blot

AIF/CHCHD4 substrates  
HOS cell line, R1

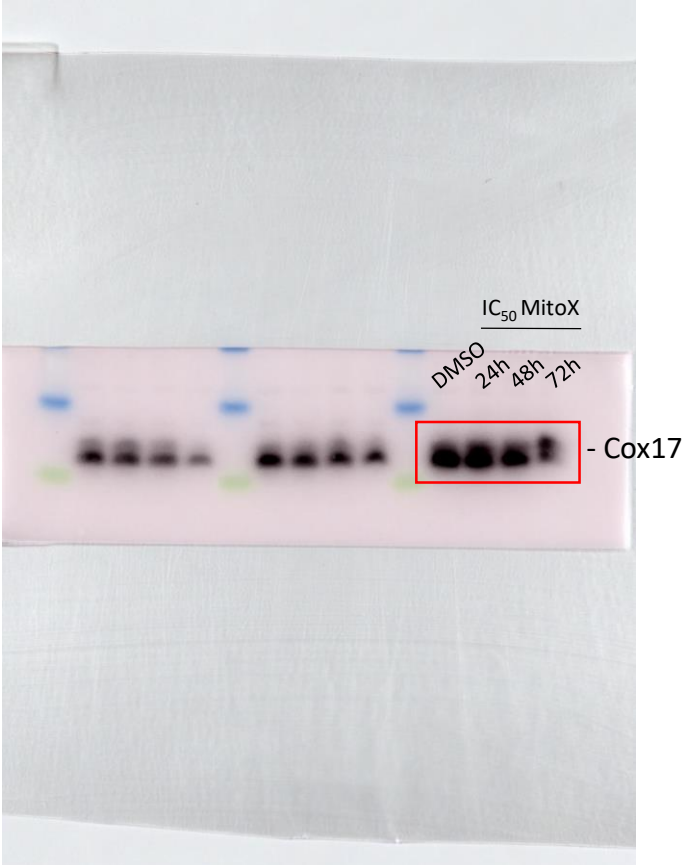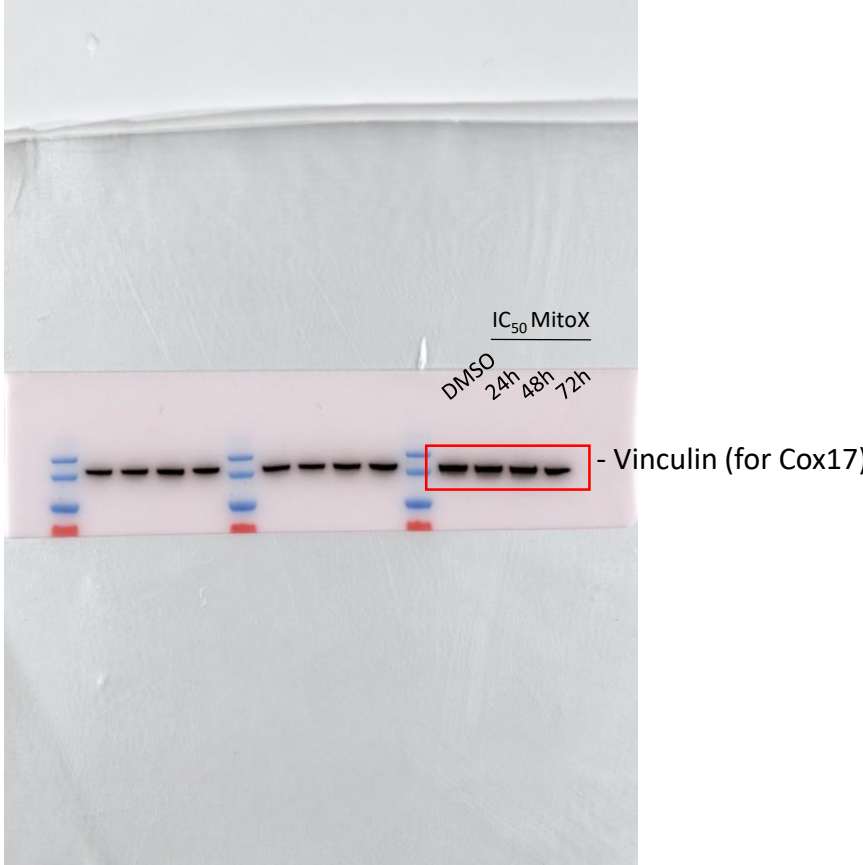

Original Western Blot

AIF/CHCHD4 substrates  
HOS cell line, replicate 2

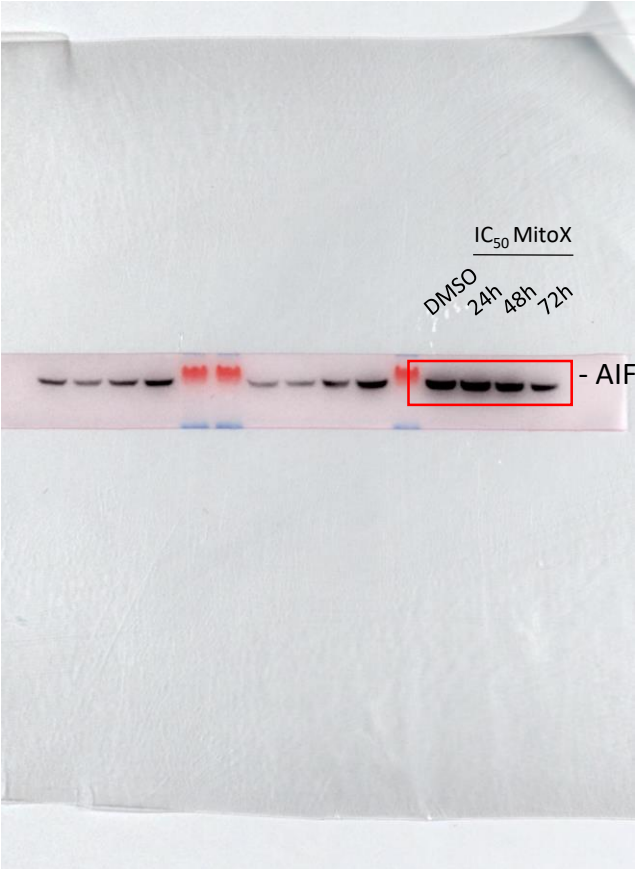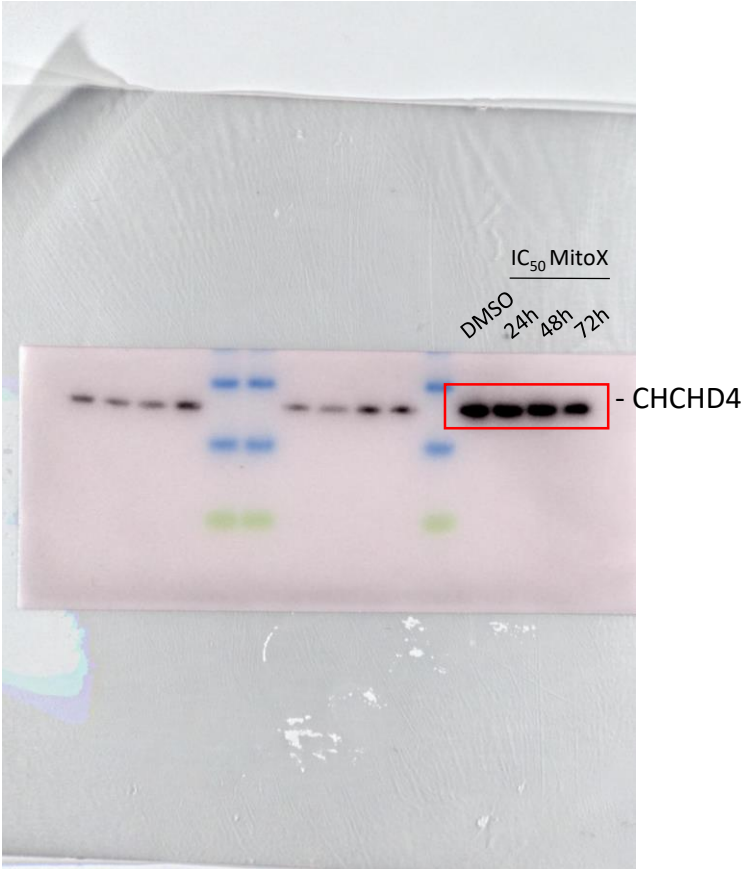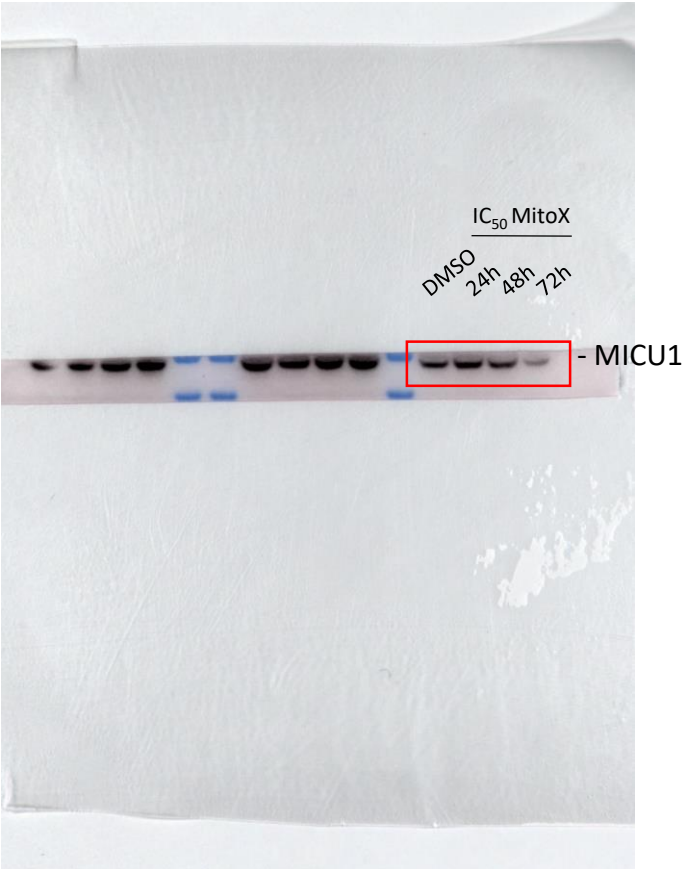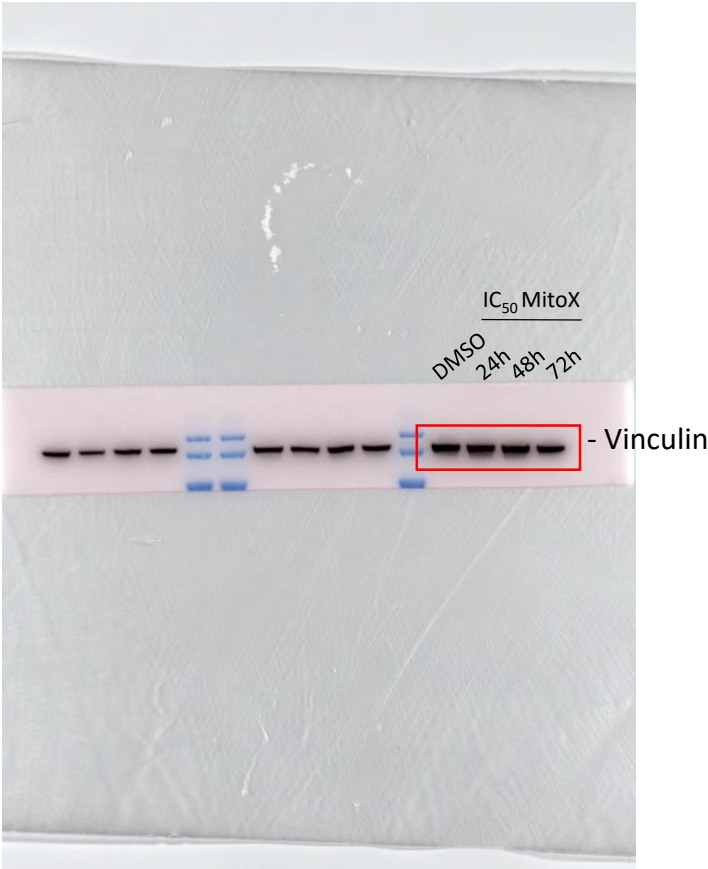

Original Western Blot

AIF/CHCHD4 substrates  
HOS cell line, replicate 2

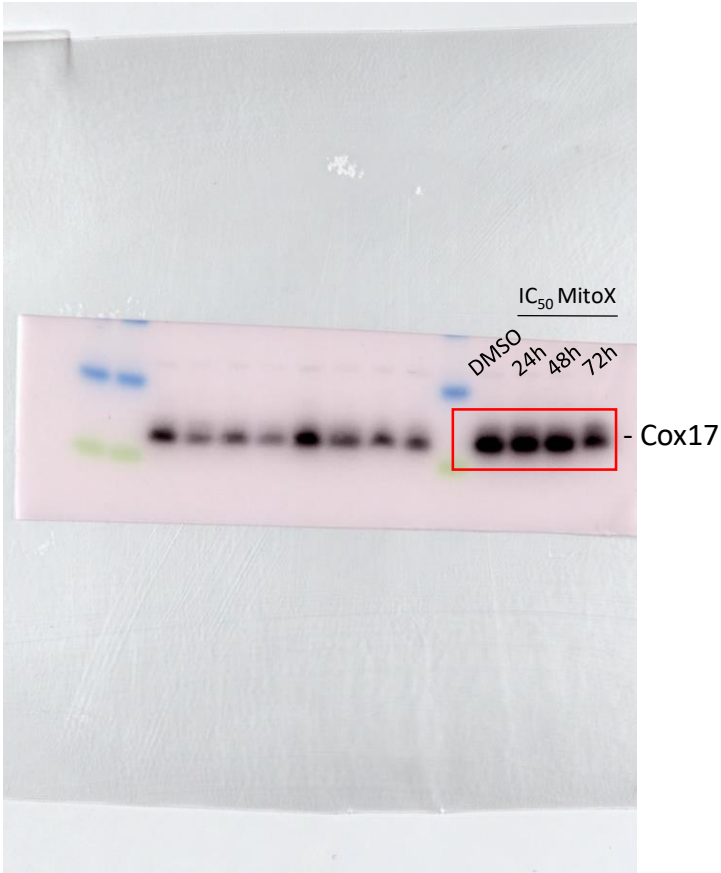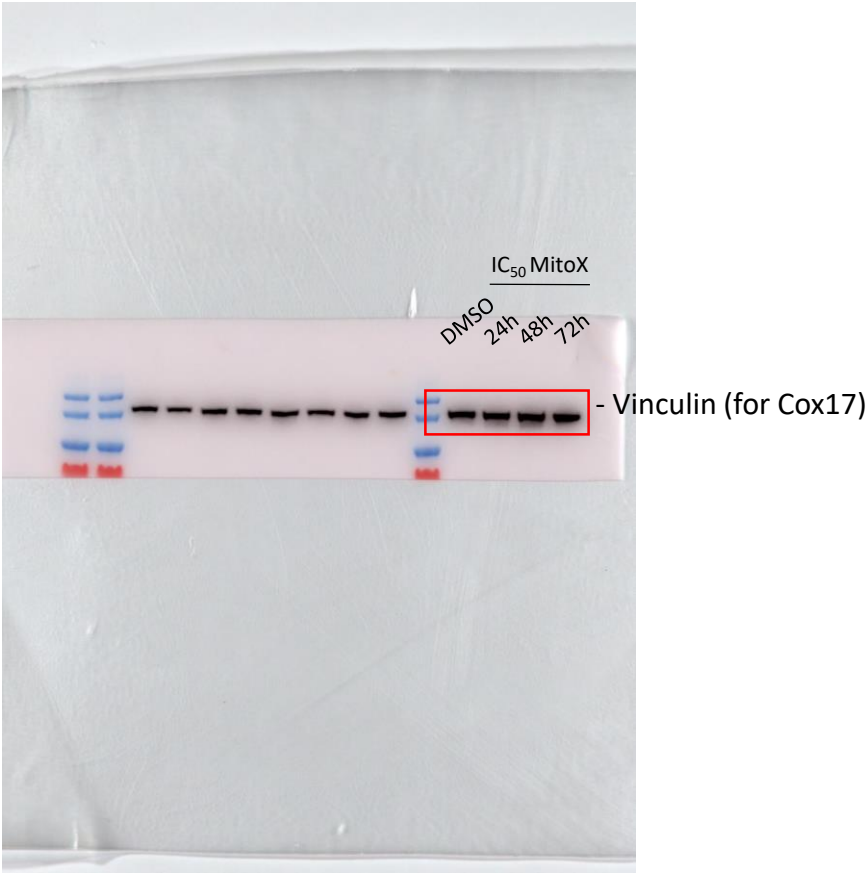

Original Western Blot

AIF/CHCHD4 substrates  
HOS cell line, replicate 3

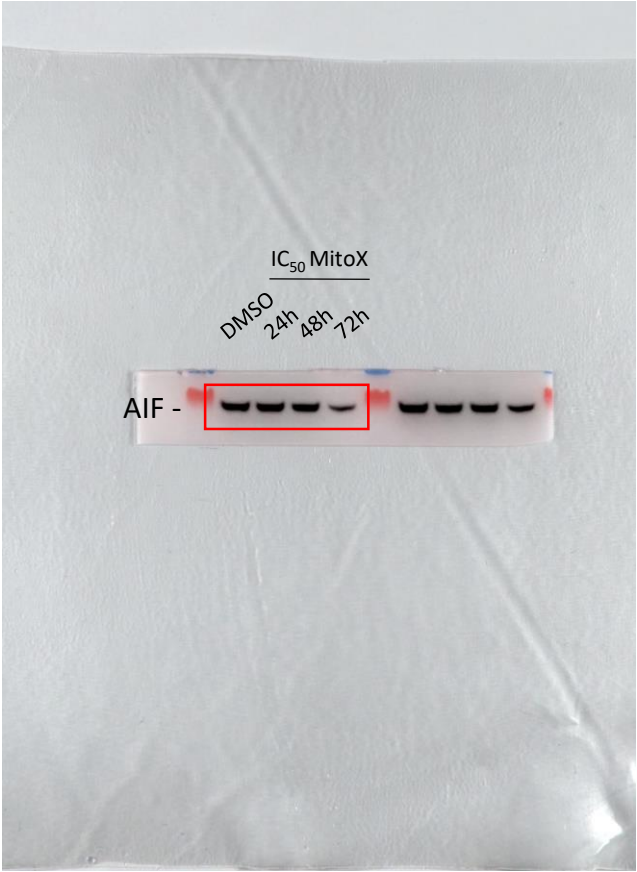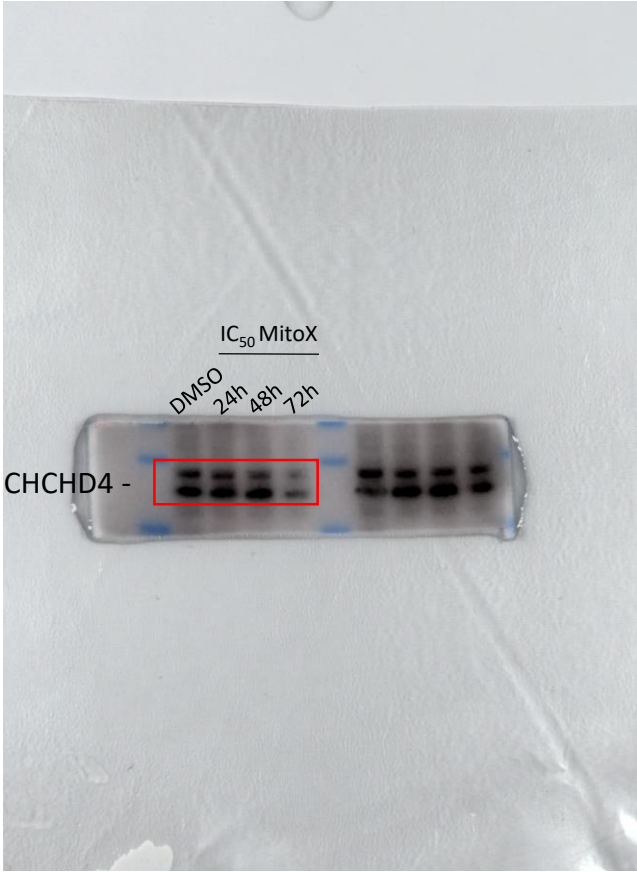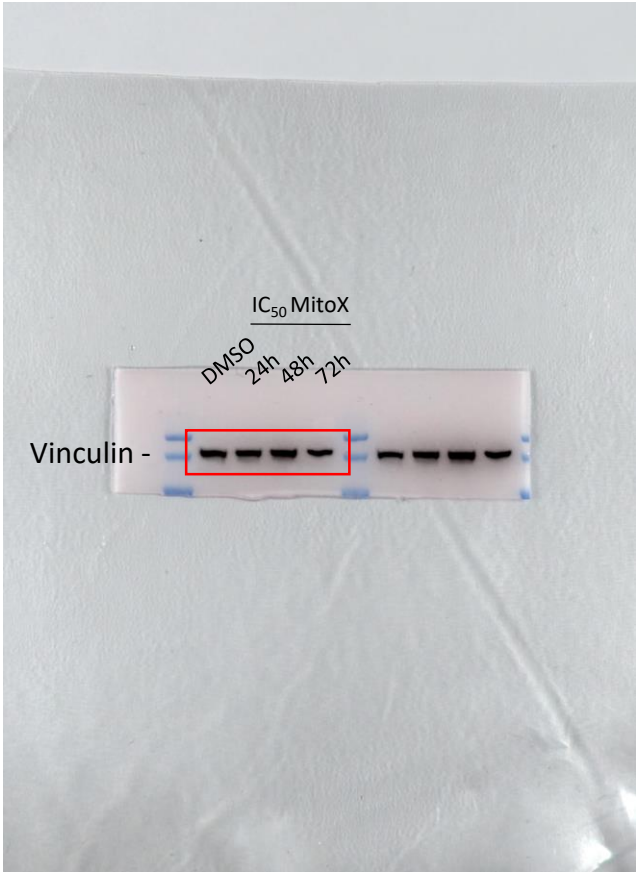

Original Western Blot

AIF/CHCHD4 substrates  
HOS cell line, replicate 3

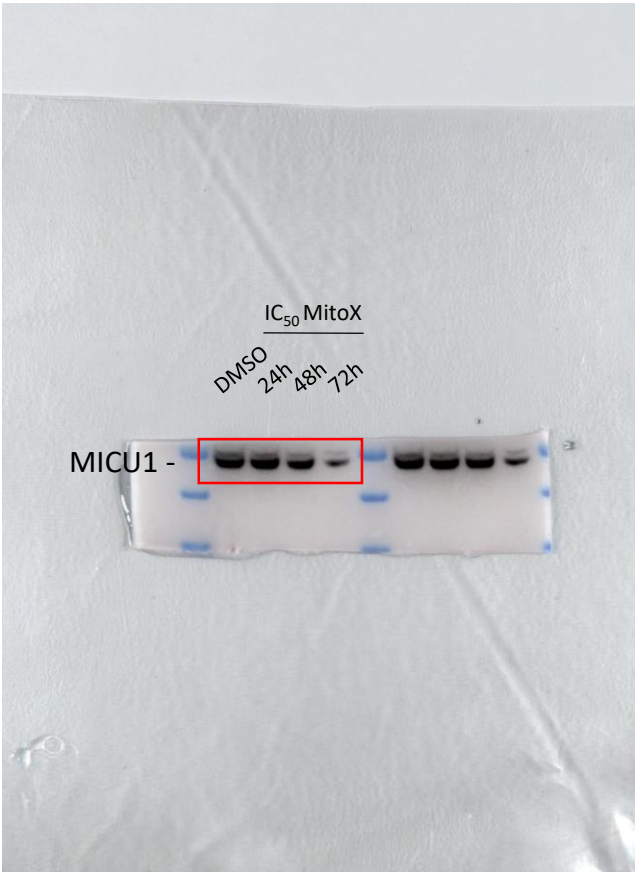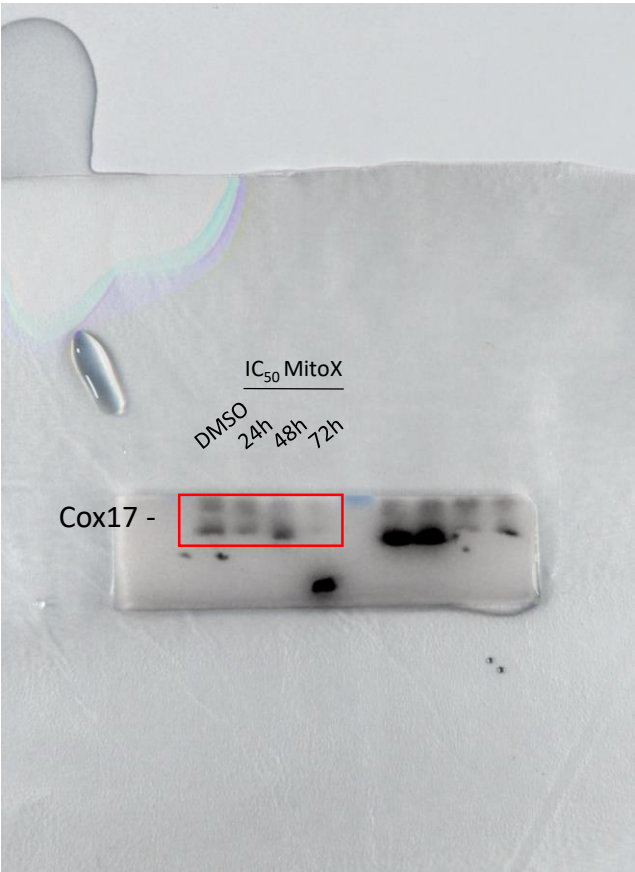

Original Western Blot

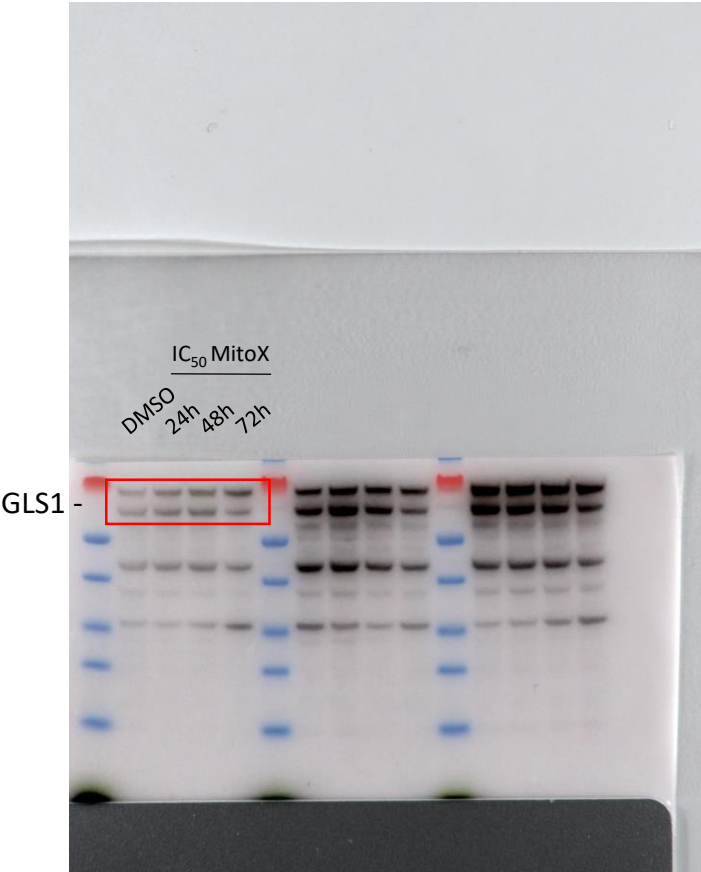

GLS1  
HOS cell line, replicate 1

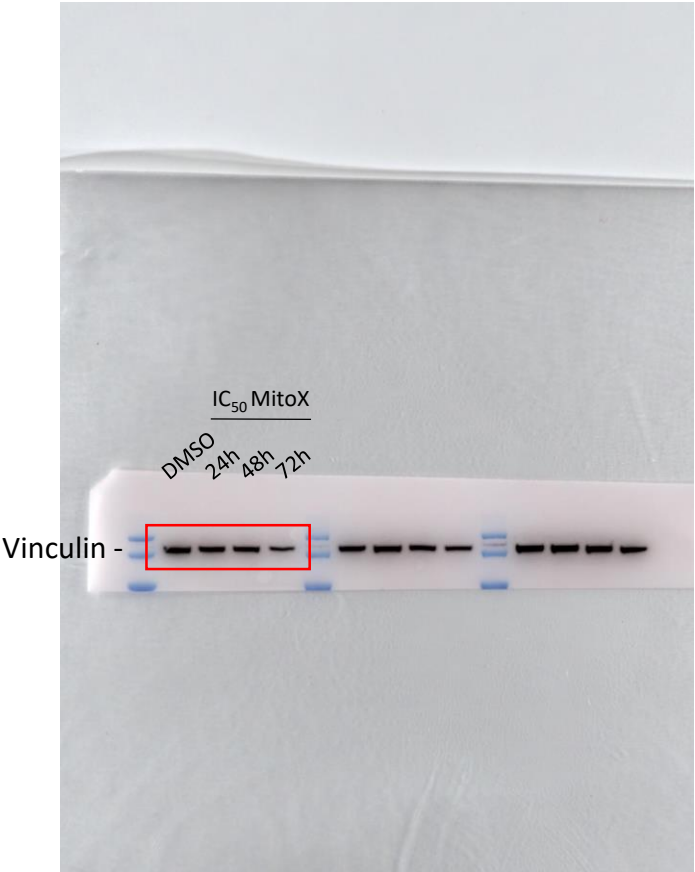

GLS1  
HOS cell line, replicate 2

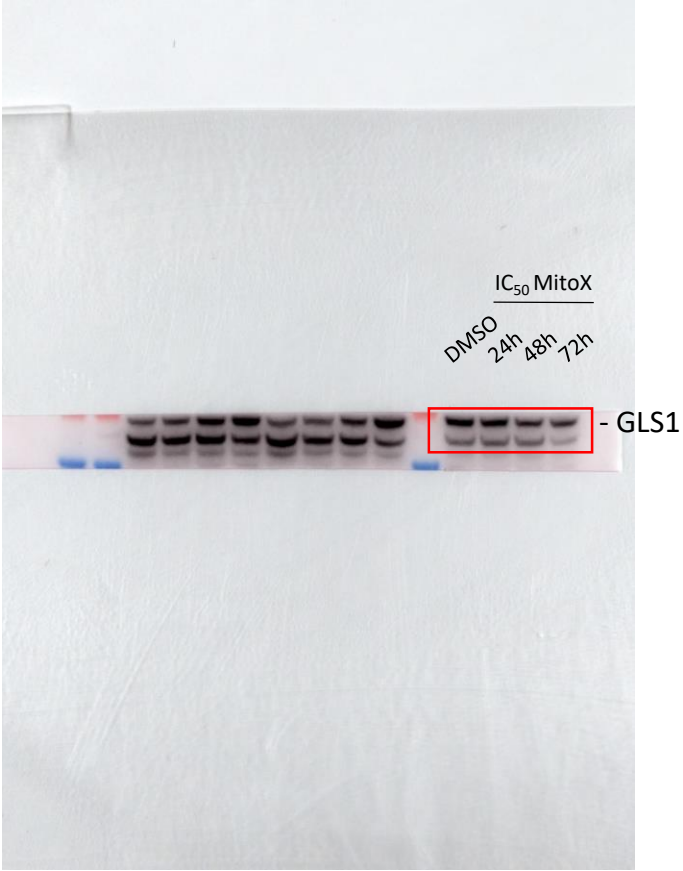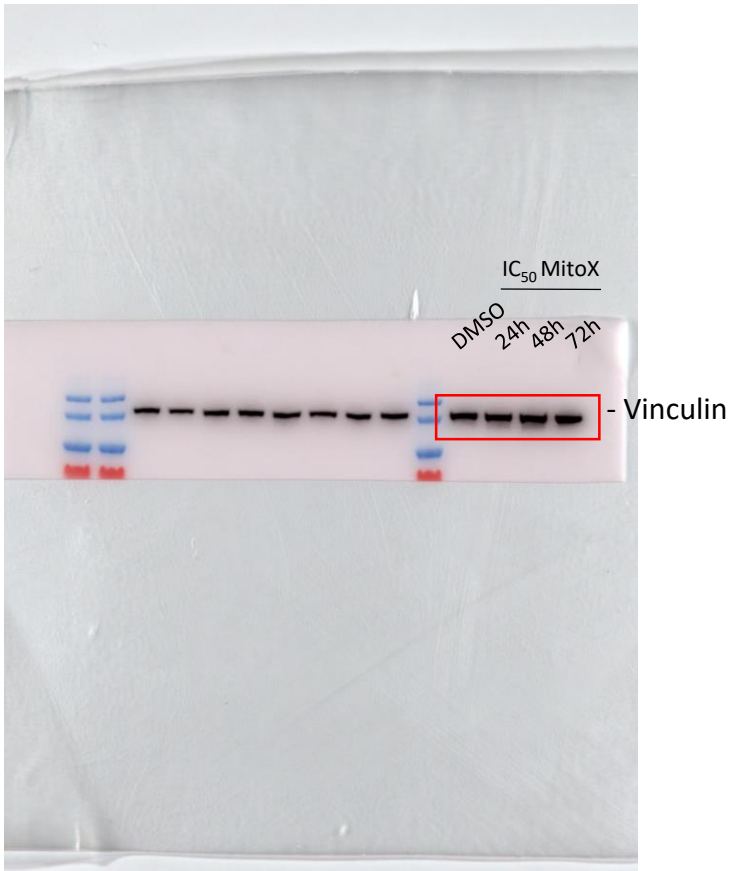

Original Western Blot

GLS1  
HOS cell line, replicate 3

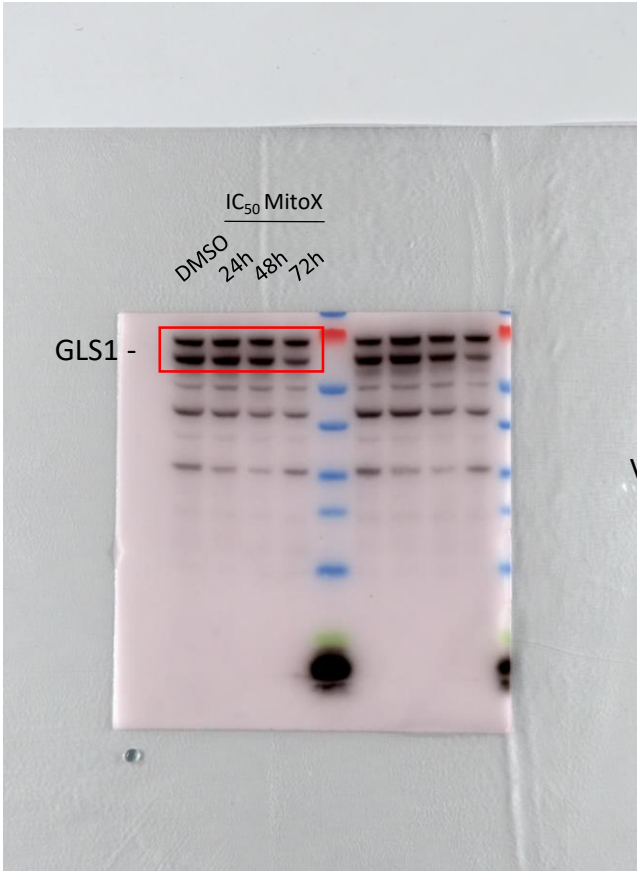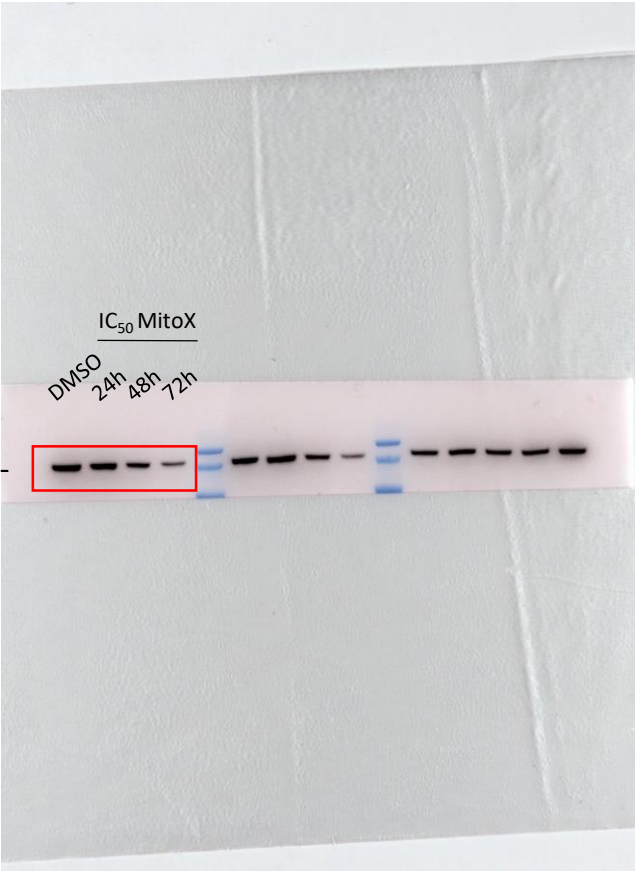

GLS1  
HOS cell line, replicate 4

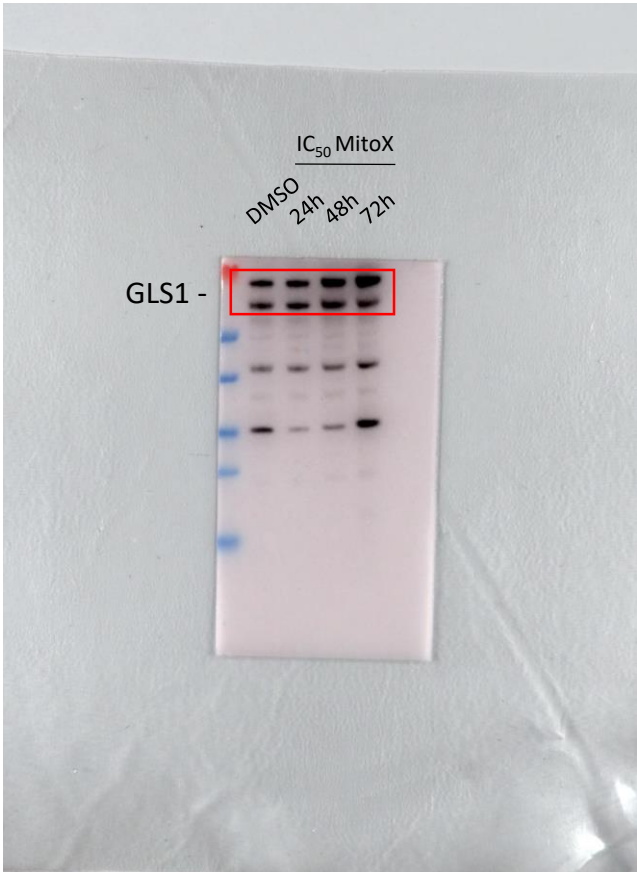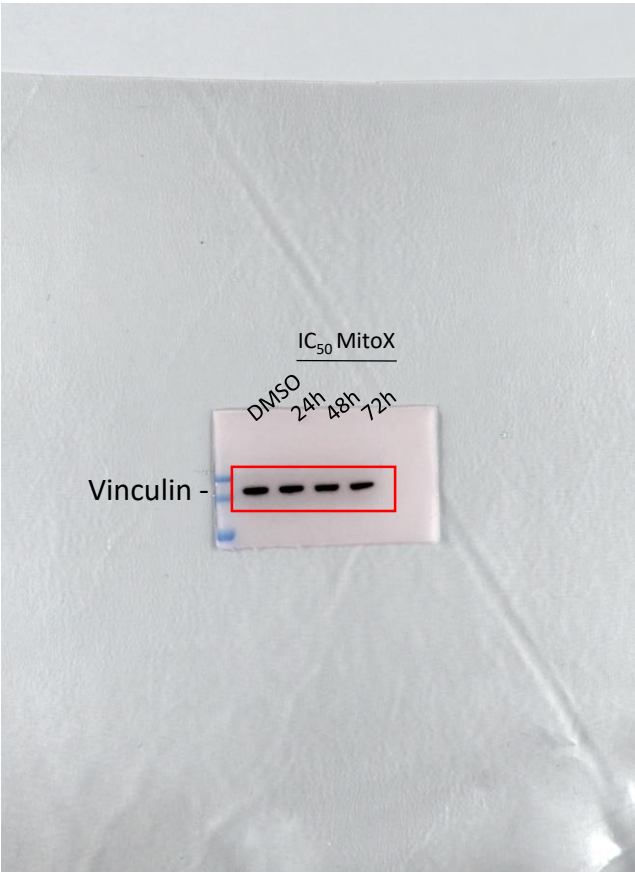

Original Western Blot

GLS1  
U2OS cell line, replicate 1

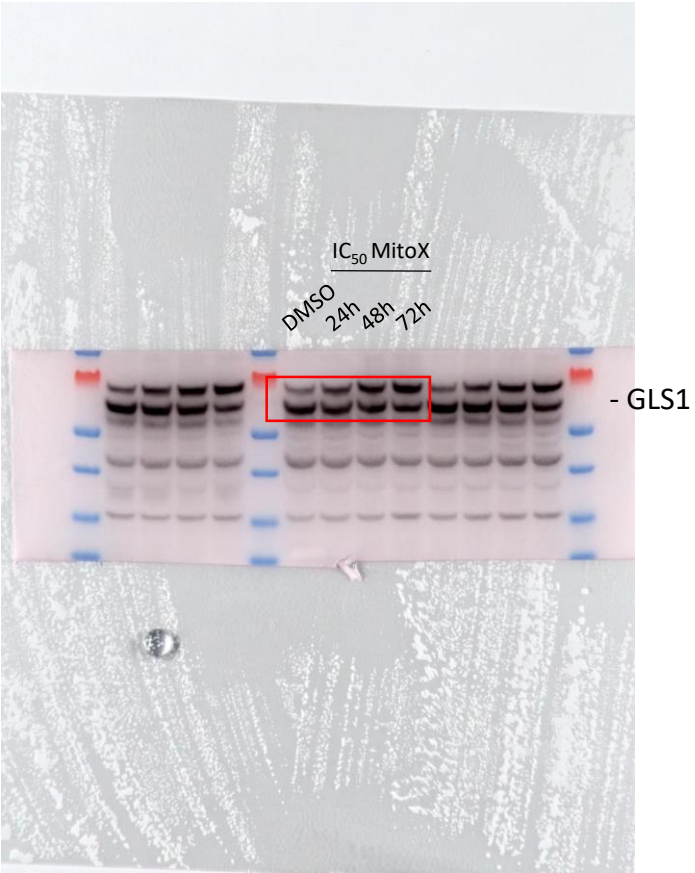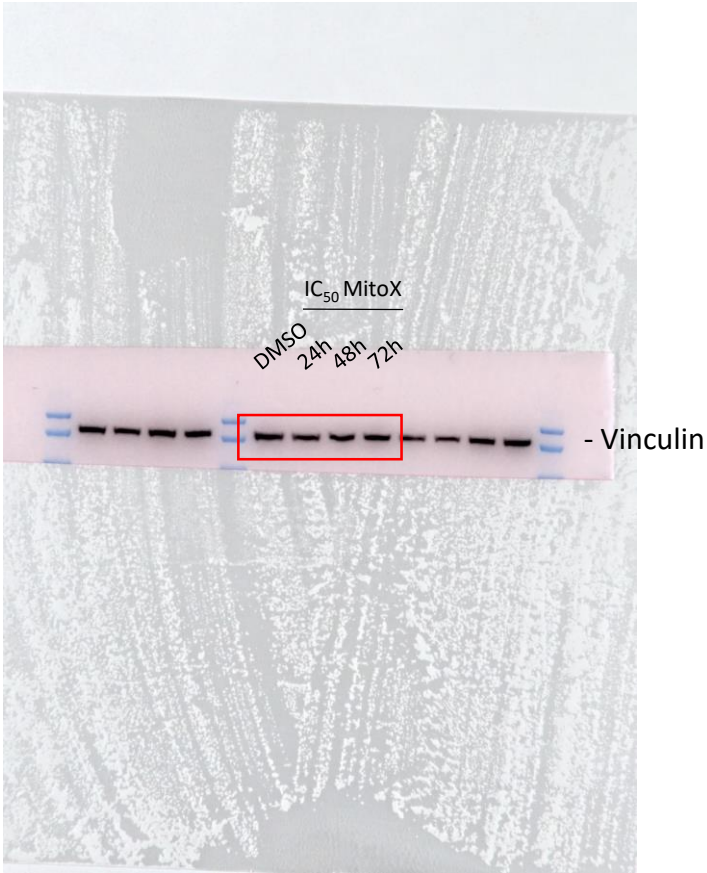

GLS1  
U2OS cell line, replicate 2

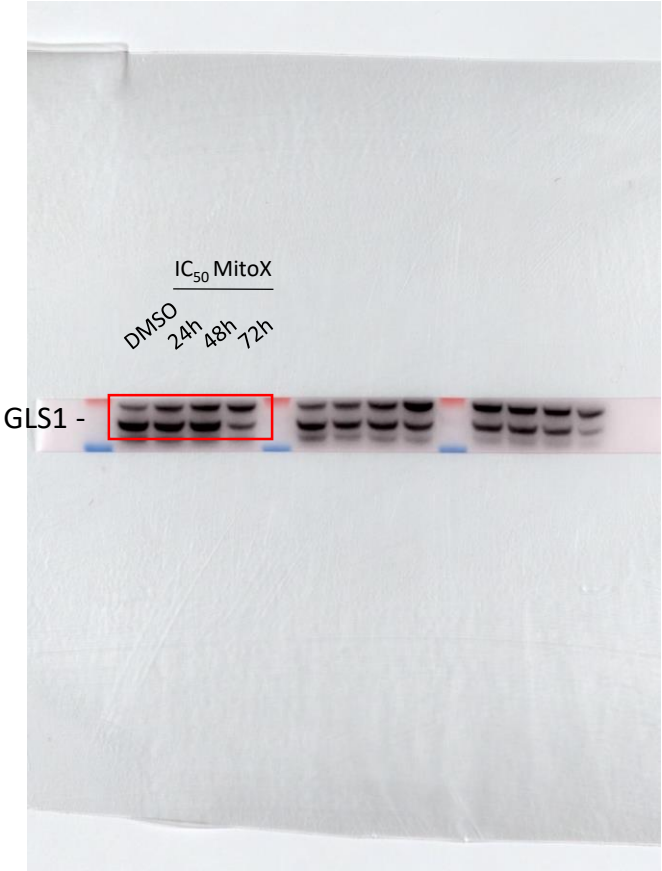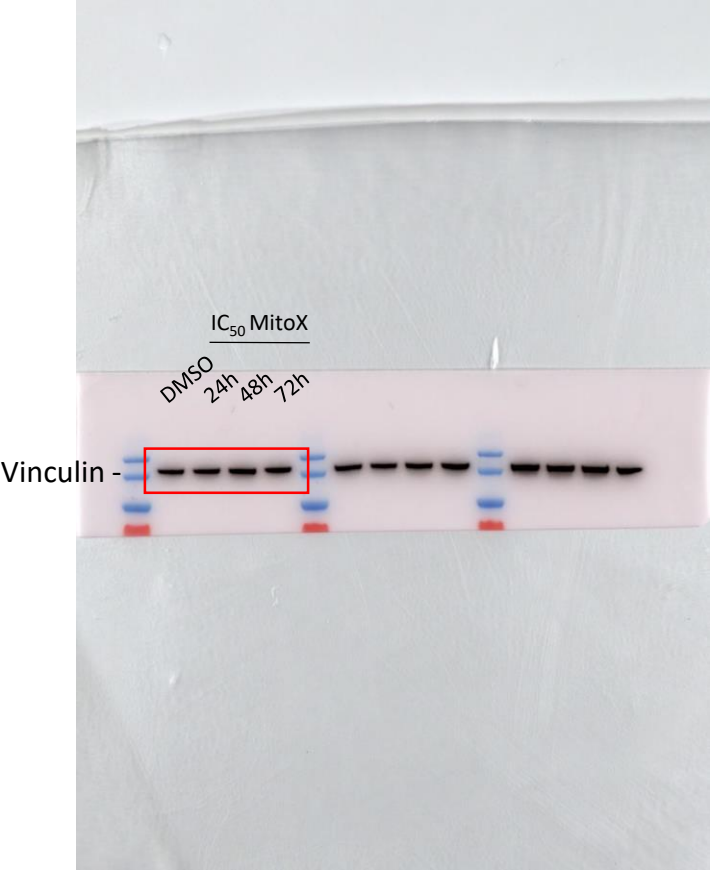

Original Western Blot

GLS1  
U2OS cell line, replicate 3

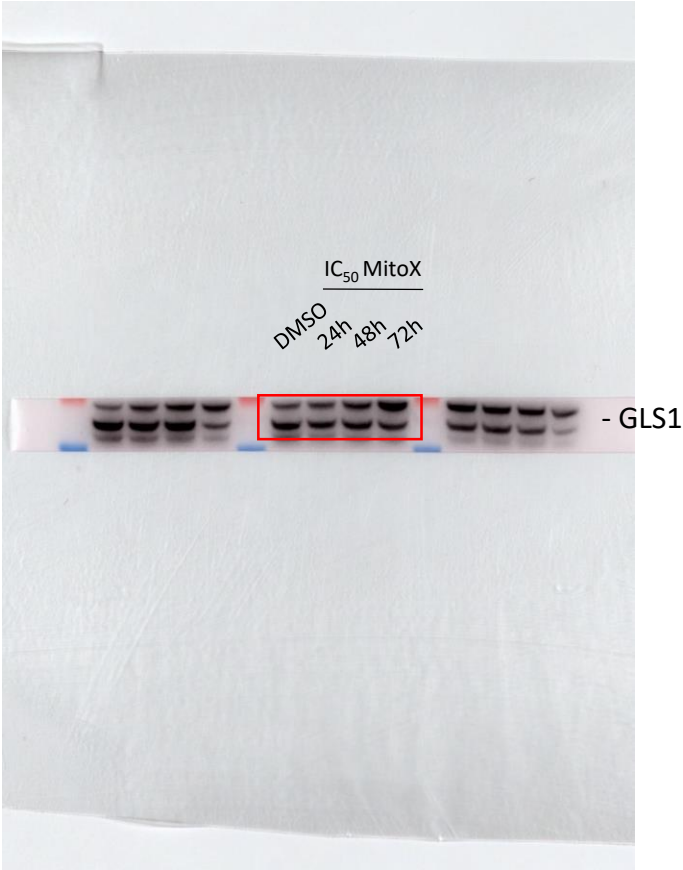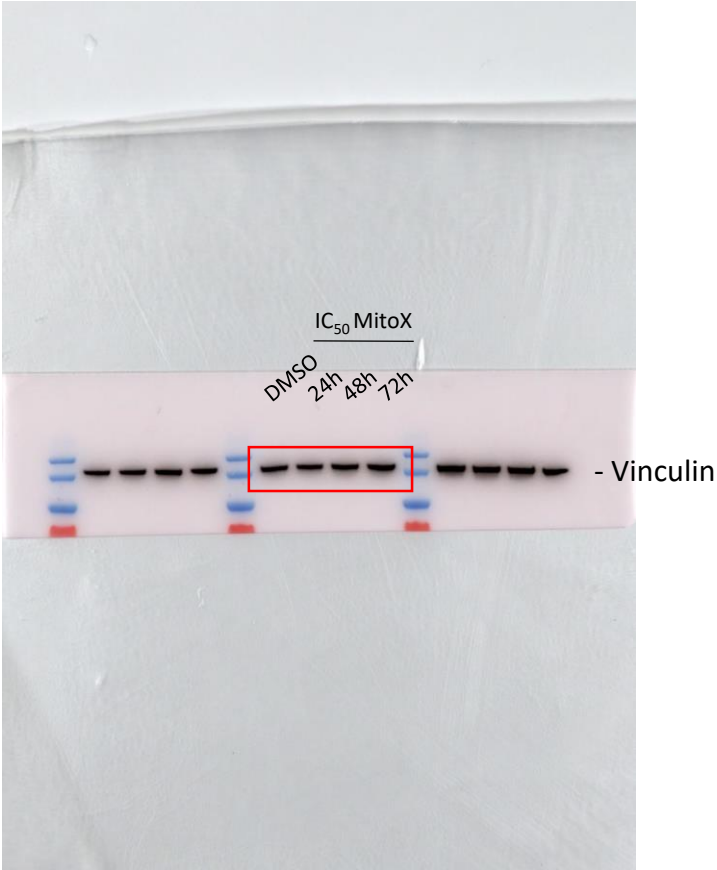

GLS1  
U2OS cell line, replicate 4

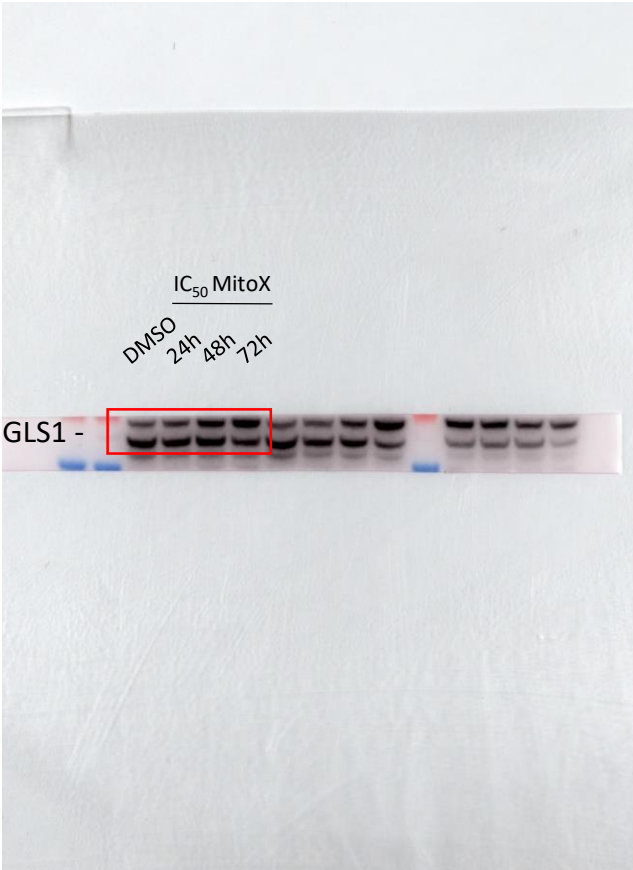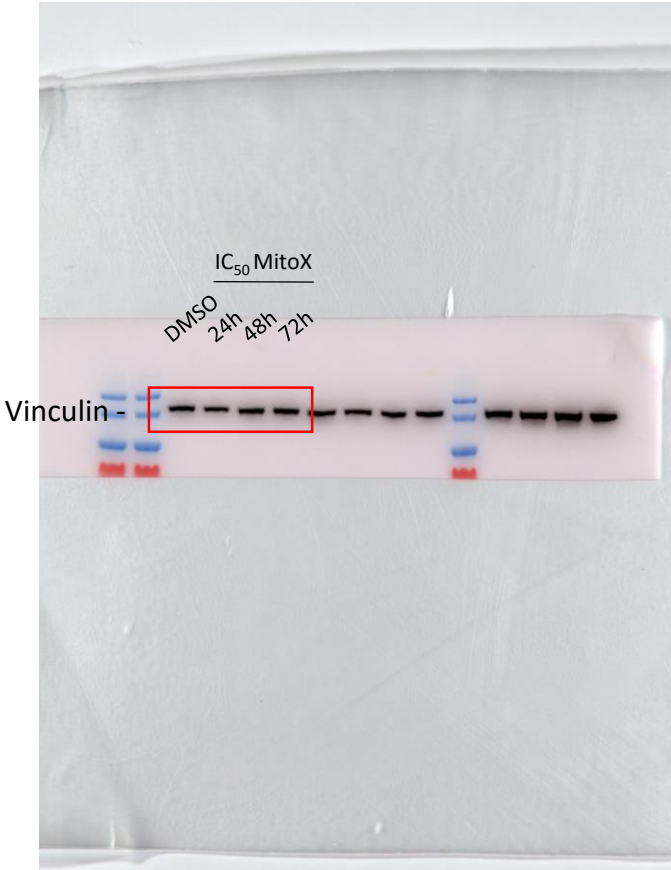

# Original Western Blot

# OXPHOS complexes HOS cell line, replicate 1

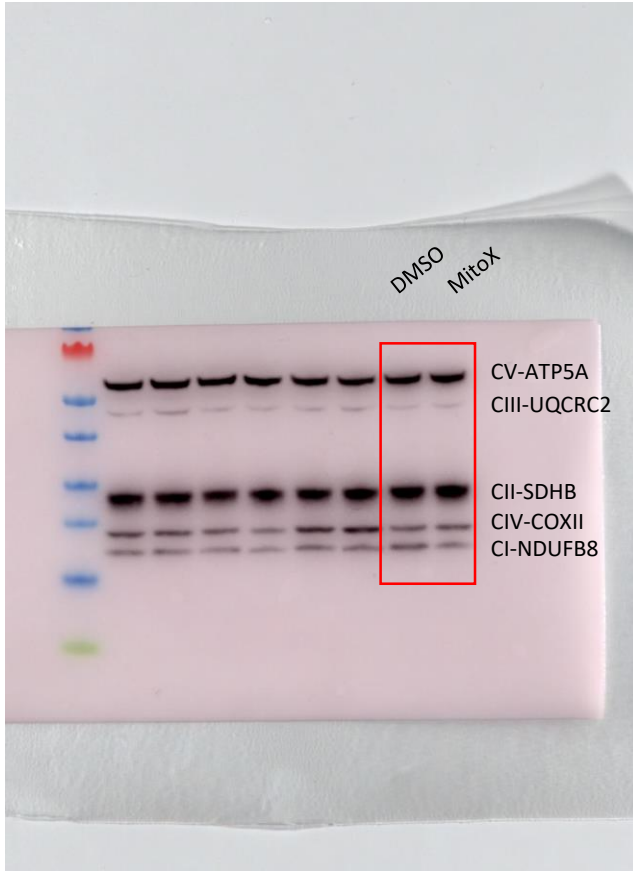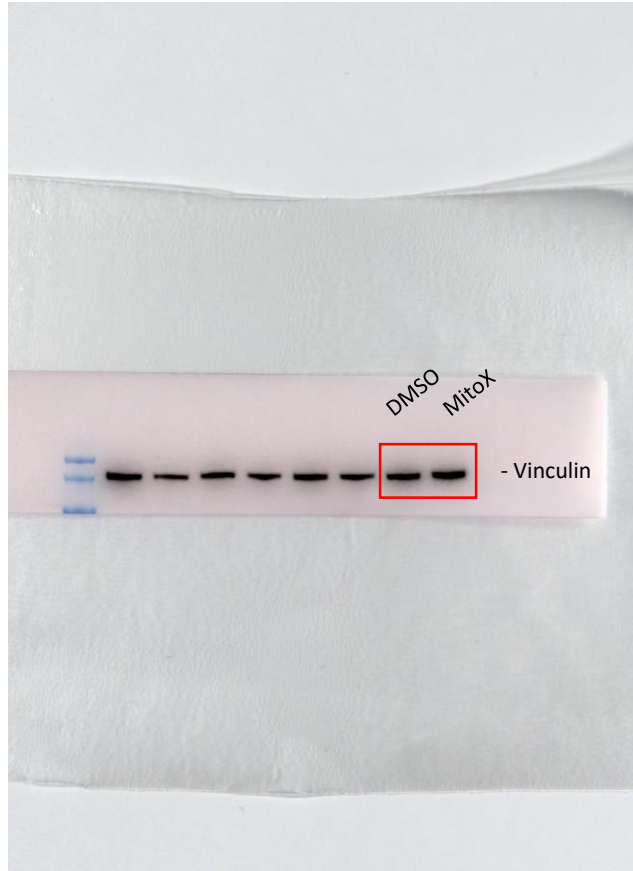

# OXPHOS complexes HOS cell line, replicates 2, 3

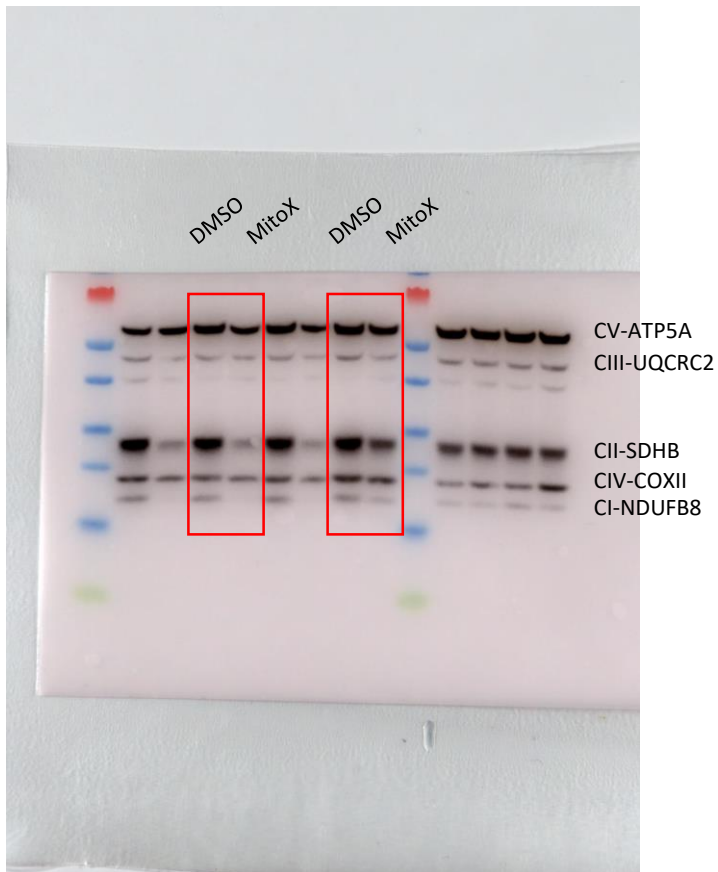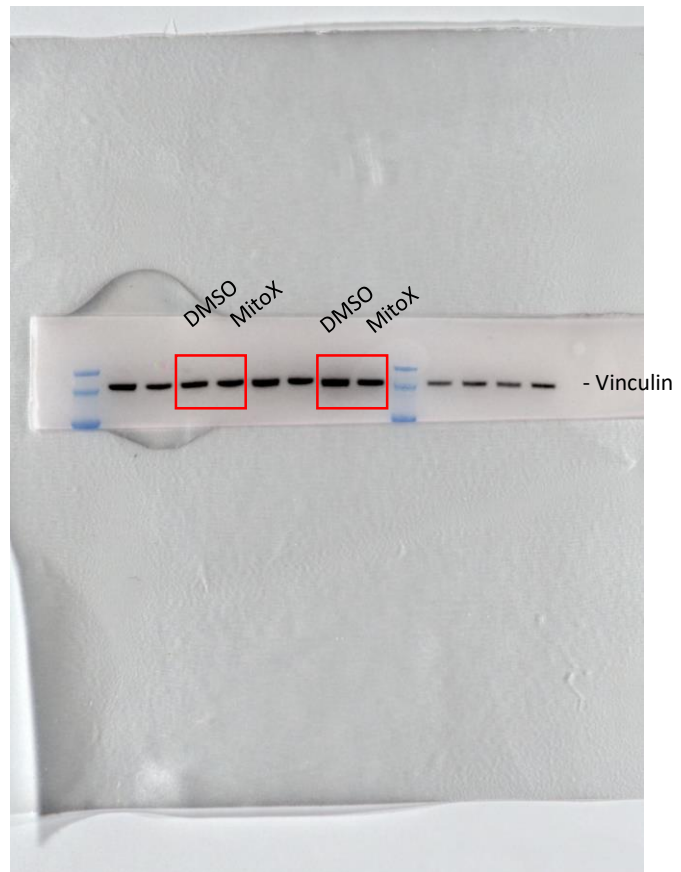

Original Western Blot

OXPPOS complexes  
HOS cell line, replicate 4

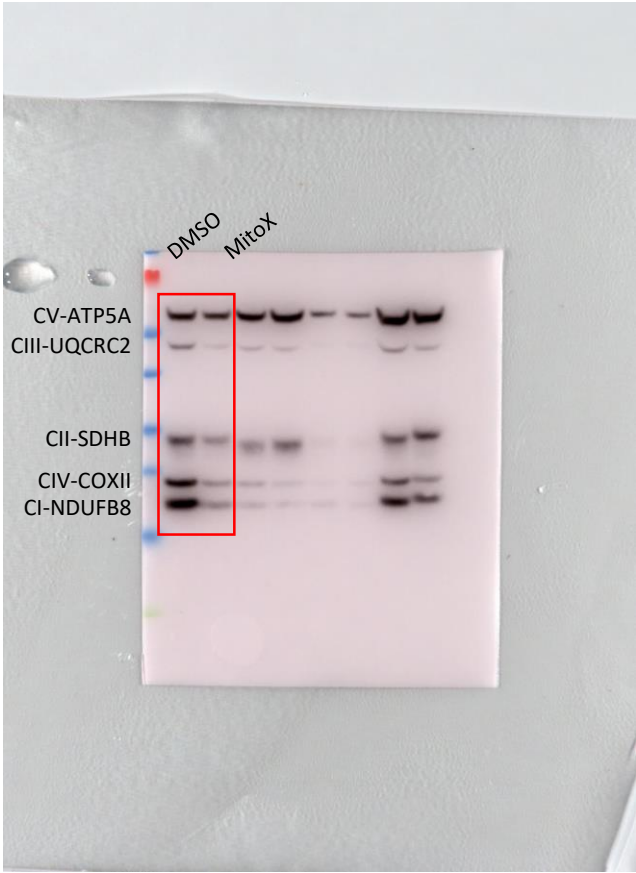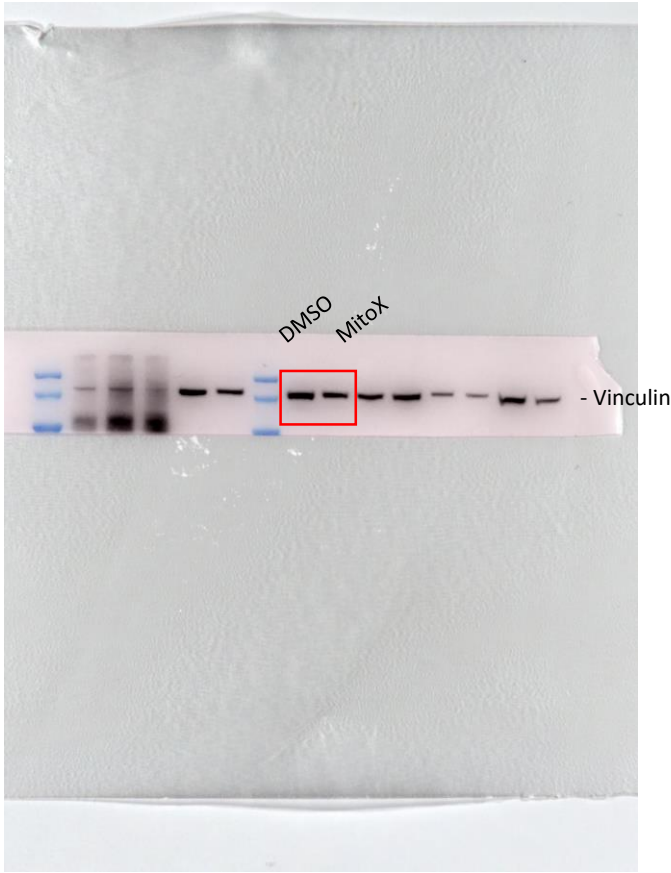

Original Western Blot

OXPHOS complexes  
U2OS cell line, replicate 1

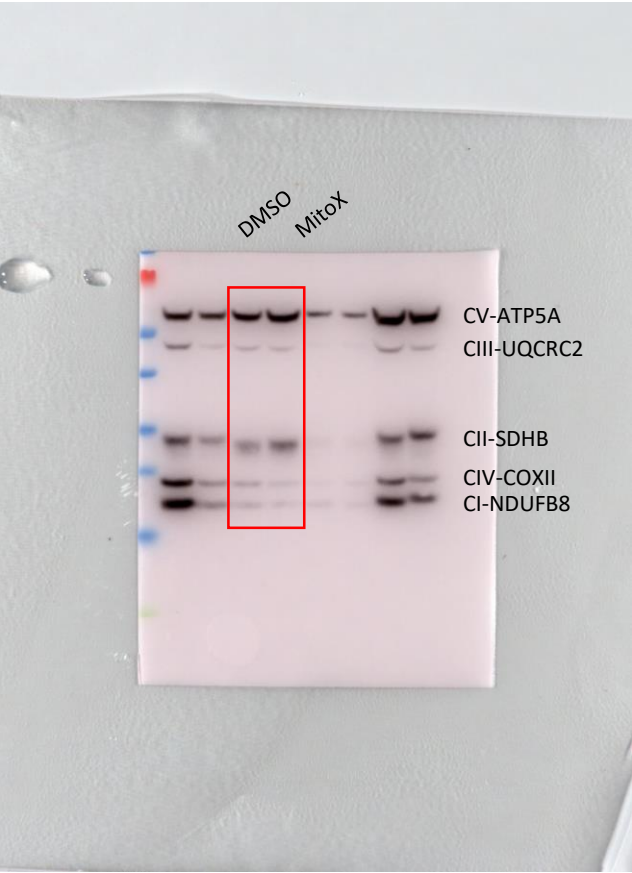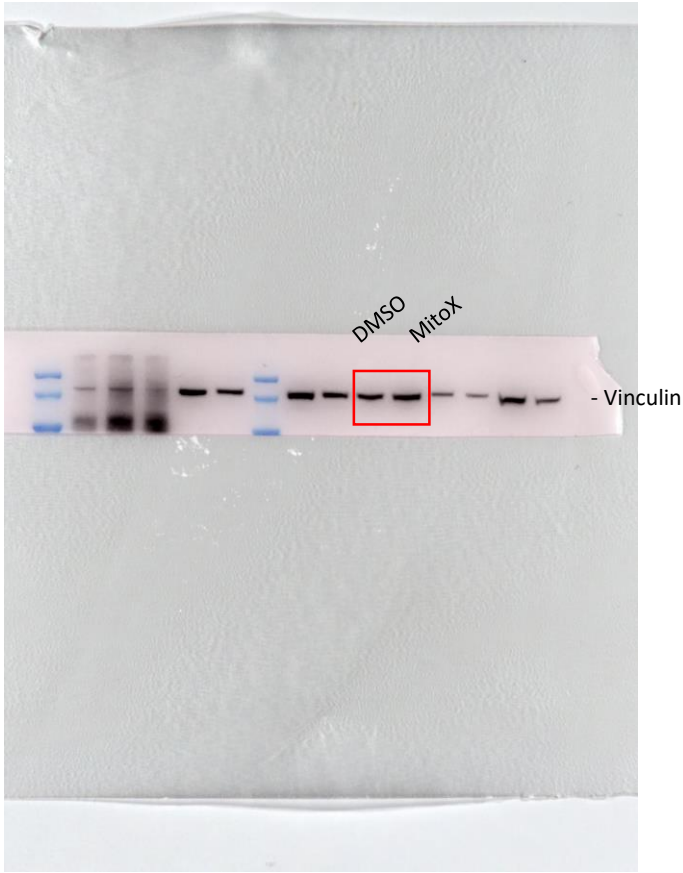

OXPHOS complexes  
U2OS cell line, replicate 2

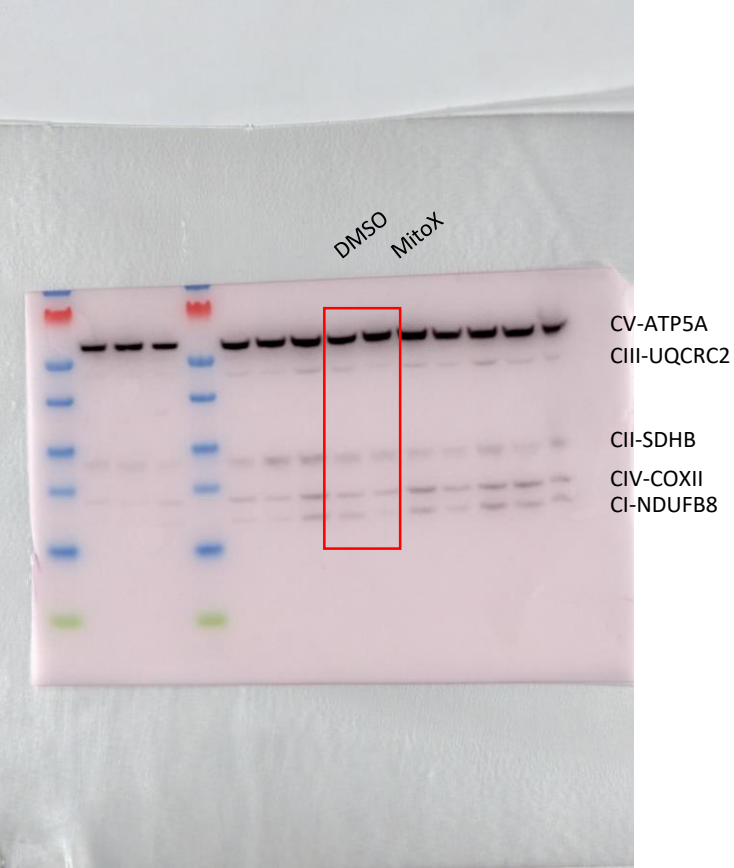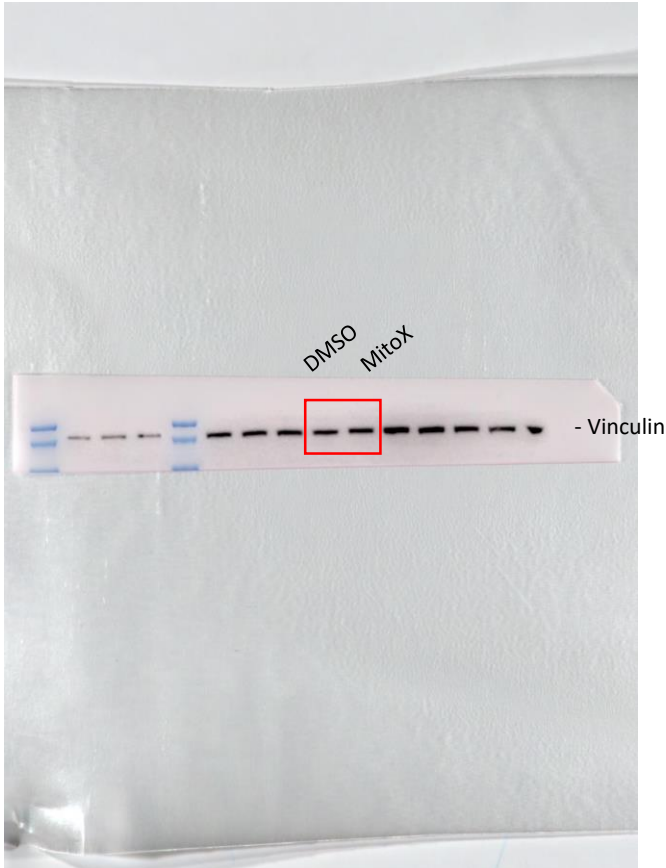

# Original Western Blot

## OXPPOS complexes U2OS cell line, replicate 3

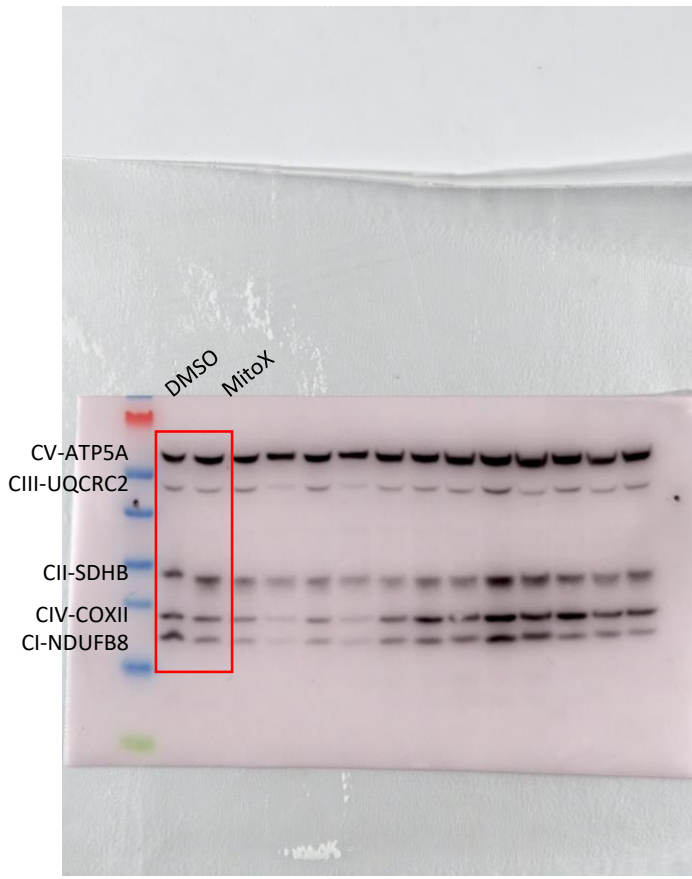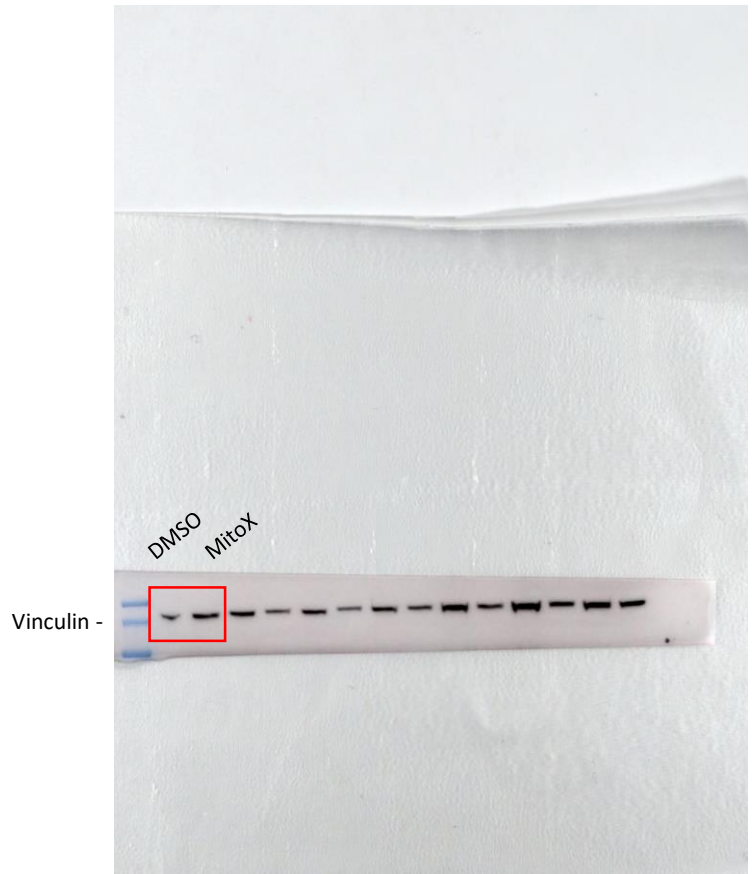

## OXPPOS complexes U2OS cell line, replicate 4

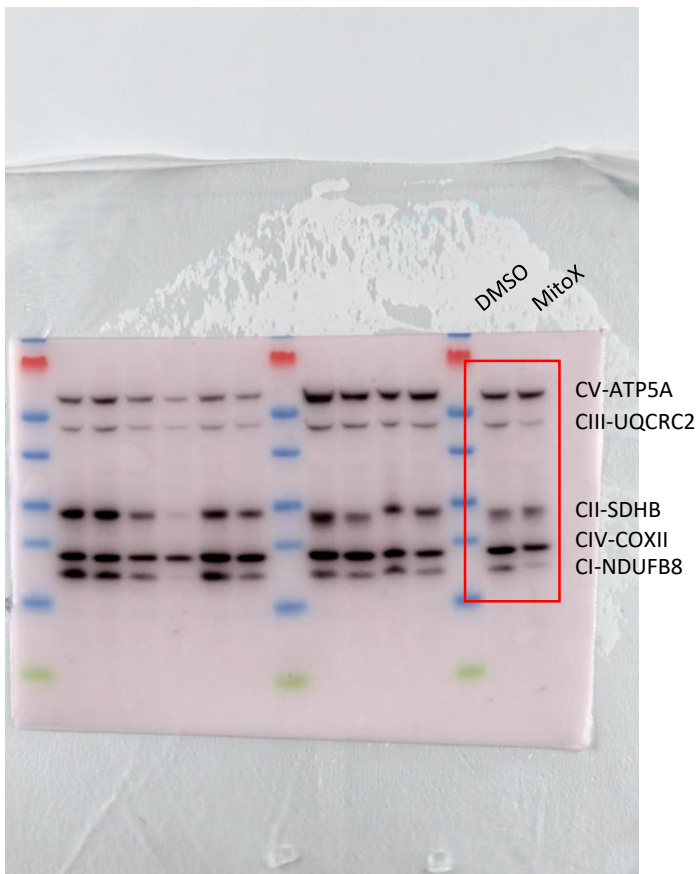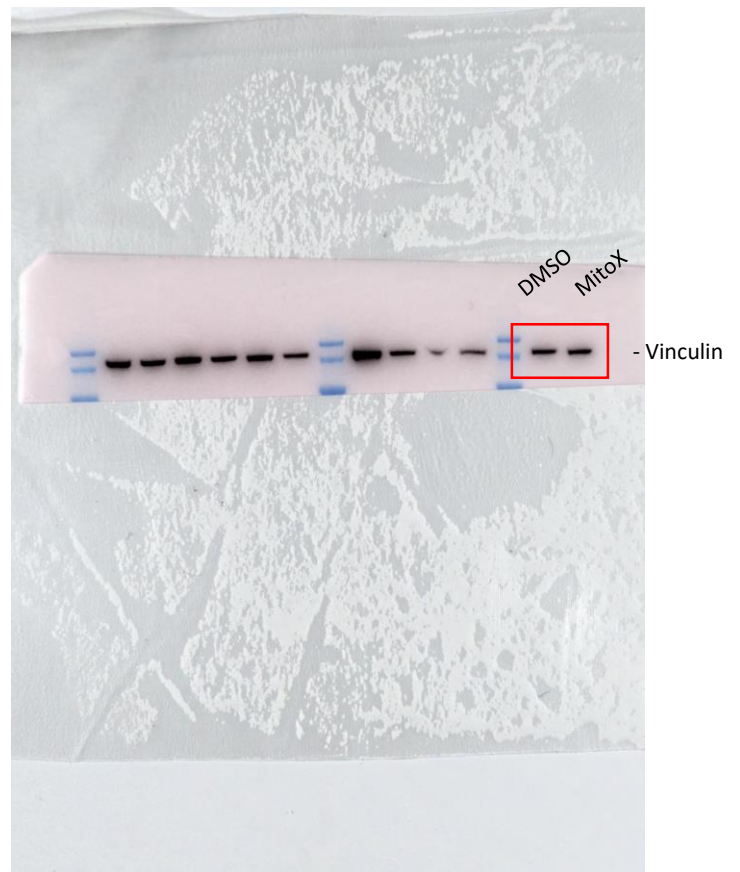

Original Western Blot

Mitochondrial mass  
HOS cell line

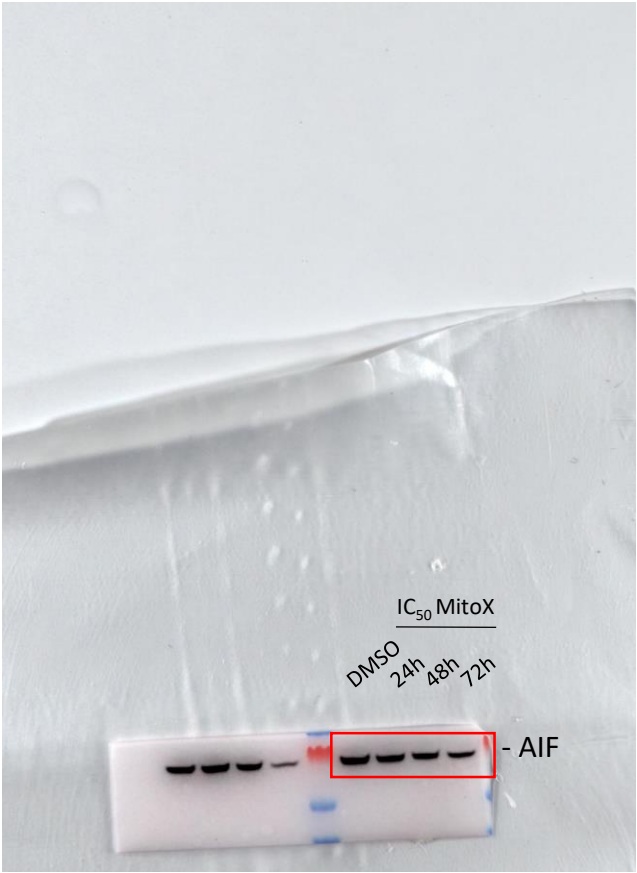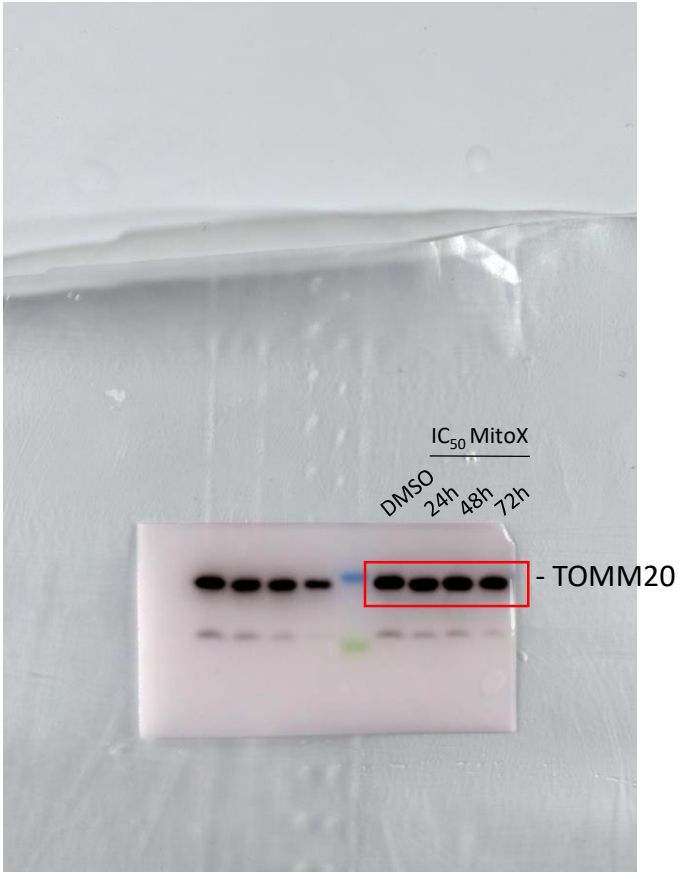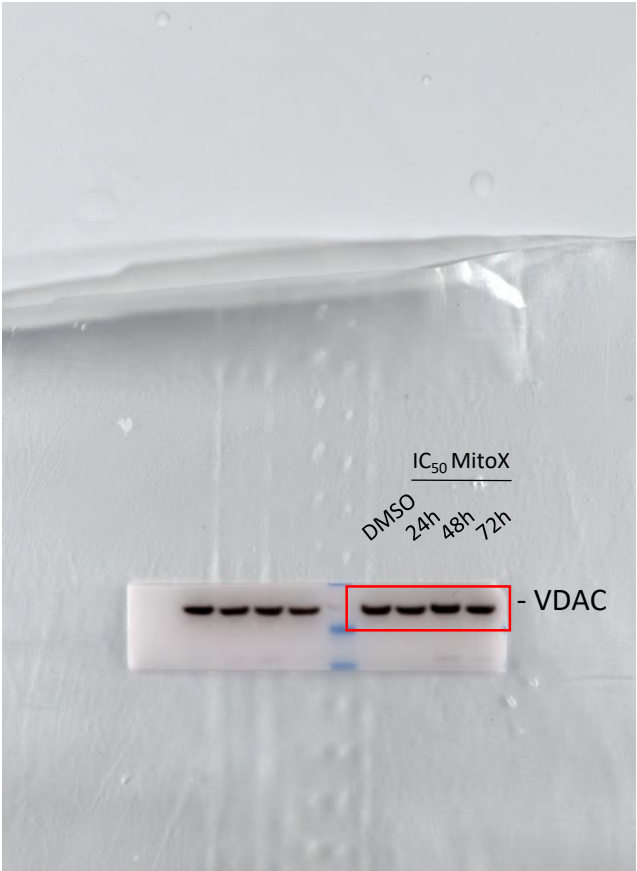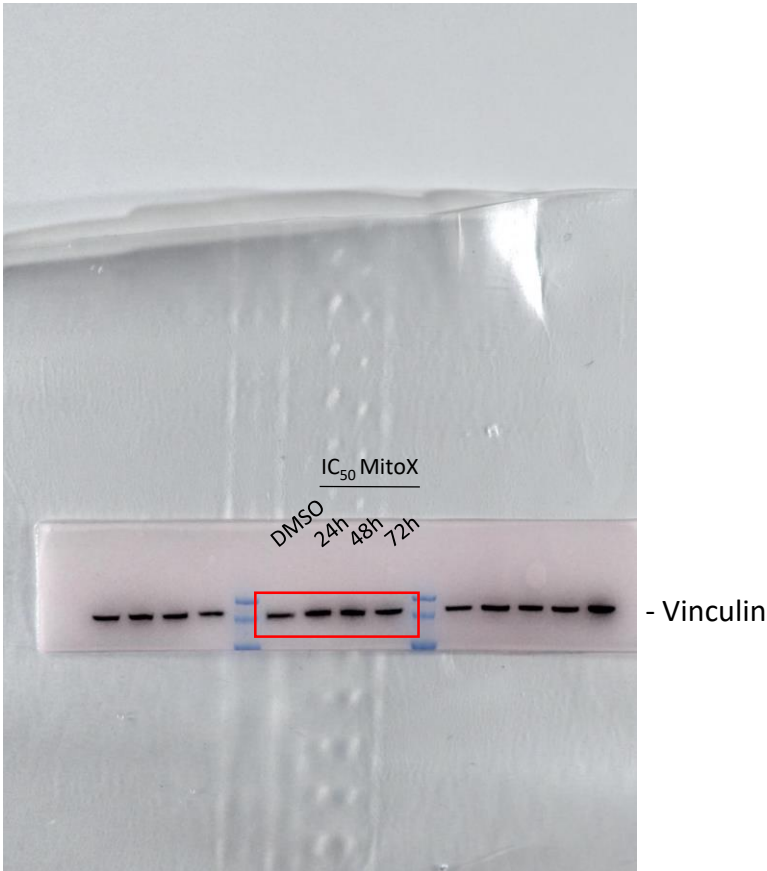

Original Western Blot

p-H2AX  
HOS cell line

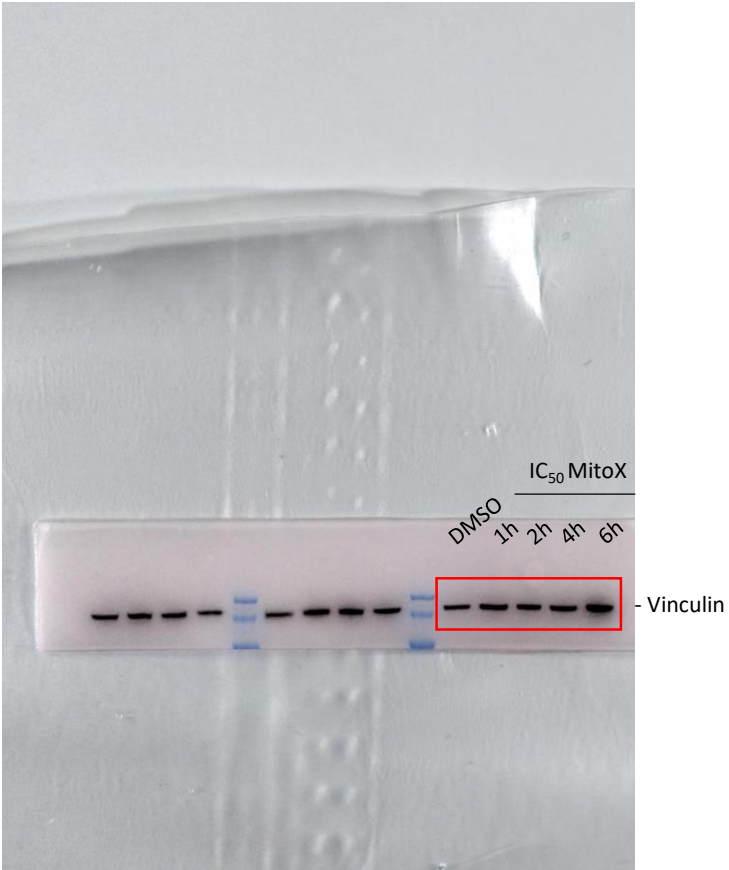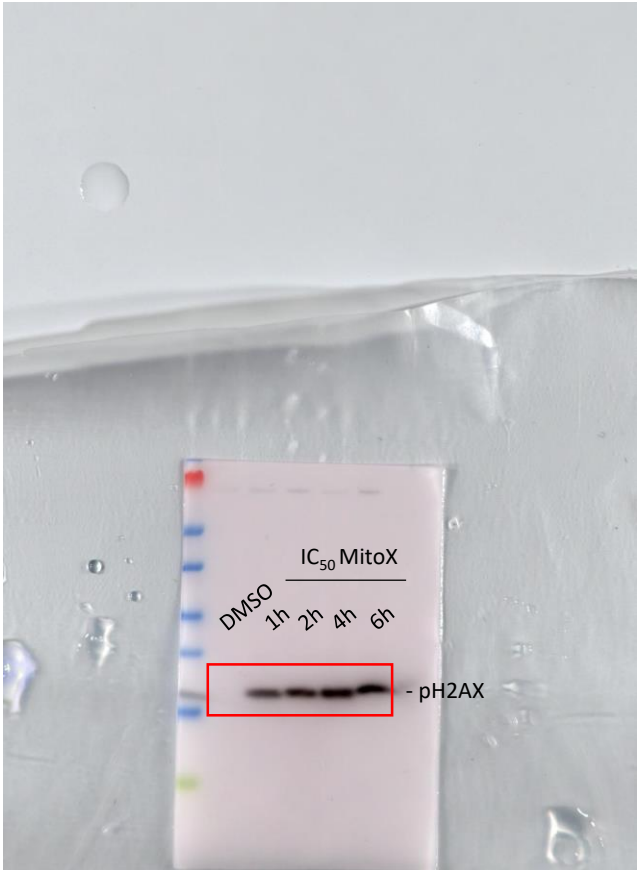

Supplement: Supplementary file 3 [file e1615923ffc288ace79cebb5.pdf]
