# Supplementary material
Source: Research Square preprint supplement (doi:10.21203/rs.3.rs-10028007/v1)

| a  | Compound name                             | CAS identifier | Chemical structure <sup>a</sup> |
|----|-------------------------------------------|----------------|---------------------------------|
| 1  | Disulfiram                                | 97-77-8        |                                 |
| 2  | Bromocriptine mesylate                    | 22260-51-1     |                                 |
| 3  | Thioridazine hydrochloride                | 130-61-0       |                                 |
| 4  | Chicago sky blue 6B                       | 2610-05-1      |                                 |
| 5  | Mitoxantrone dihydrochloride              | 70476-82-3     |                                 |
| 6  | Rifapentine                               | 61379-65-5     |                                 |
| 7  | Tetraethylenepentamine pentahydrochloride | 4961-41-5      |                                 |
| 8  | Nisoldipine                               | 63675-72-9     |                                 |
| 9  | Merbromin                                 | 129-16-8       |                                 |
| 10 | Thiethylperazine dimalate                 | 52239-63-1     |                                 |
| 11 | Benidipine hydrochloride                  | 91599-74-5     |                                 |

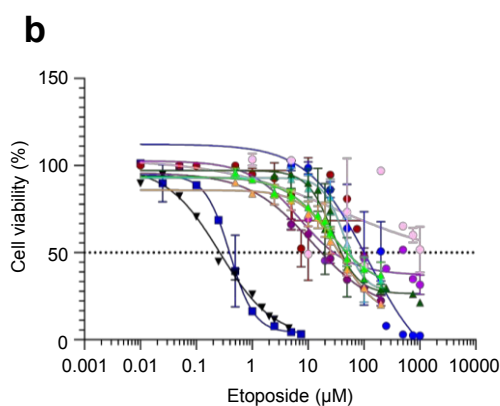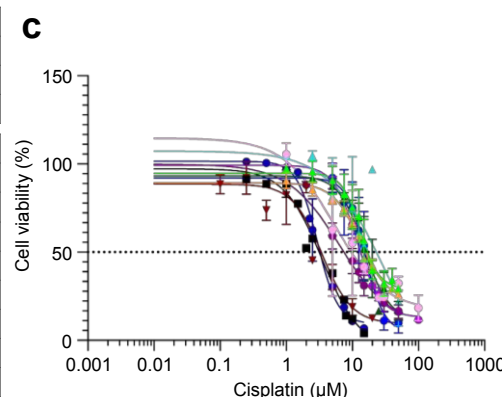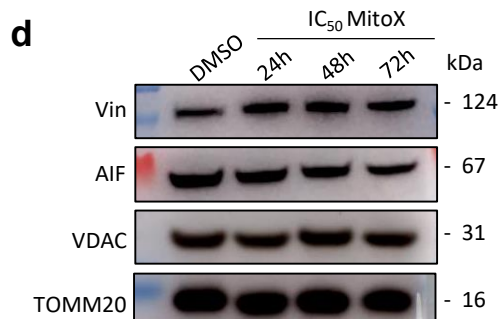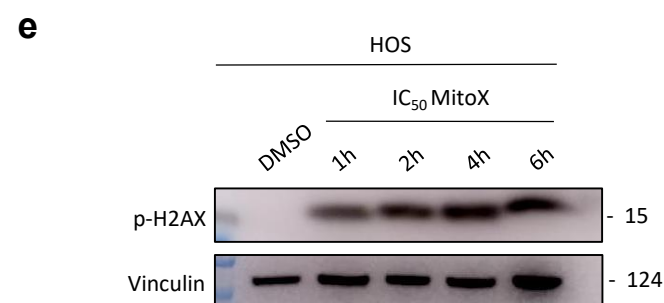

Supplement: Supplementary file 2 [file de203fb222b75cc77351aa94.pdf]
