# Supplementary material
Source: Research Square preprint supplement (doi:10.21203/rs.3.rs-10028007/v1)

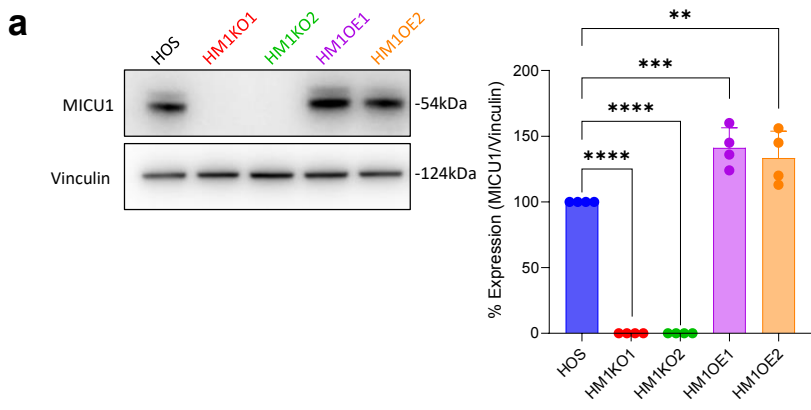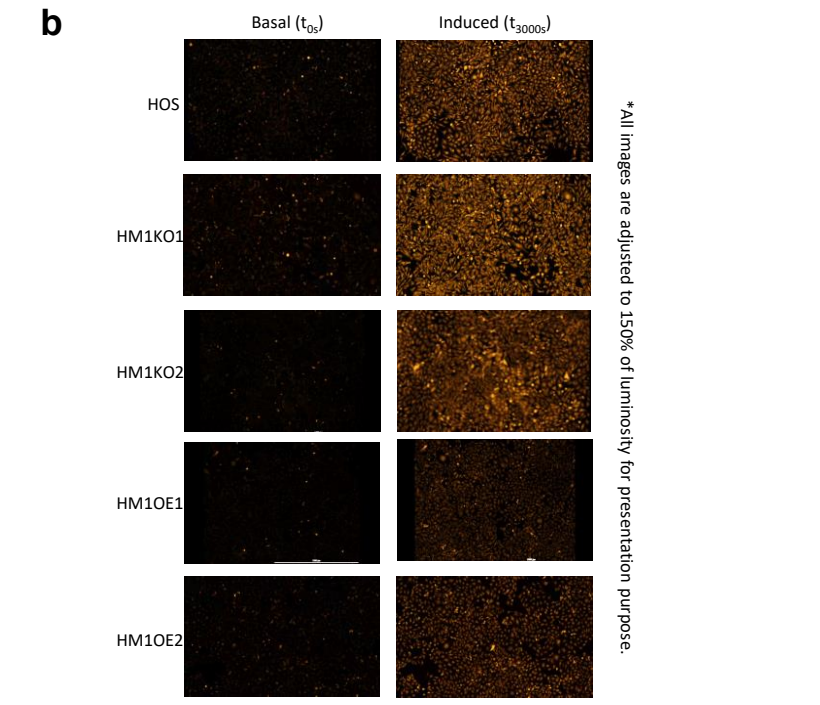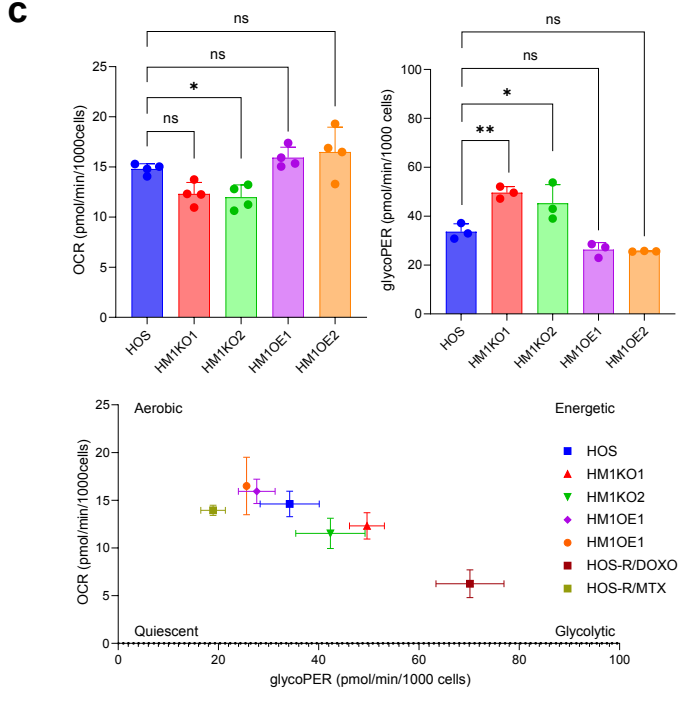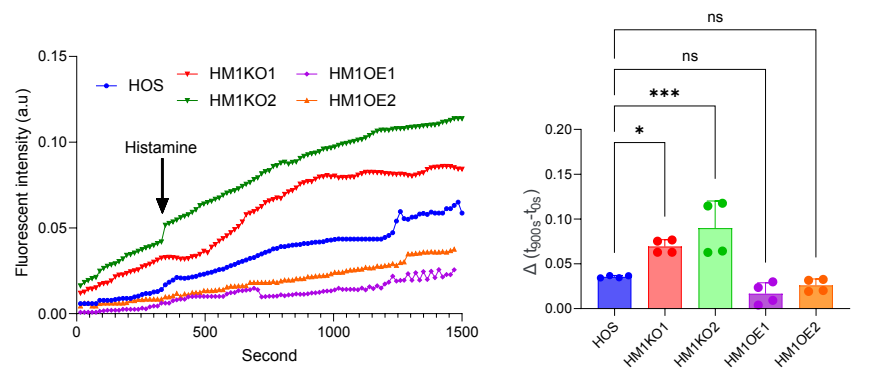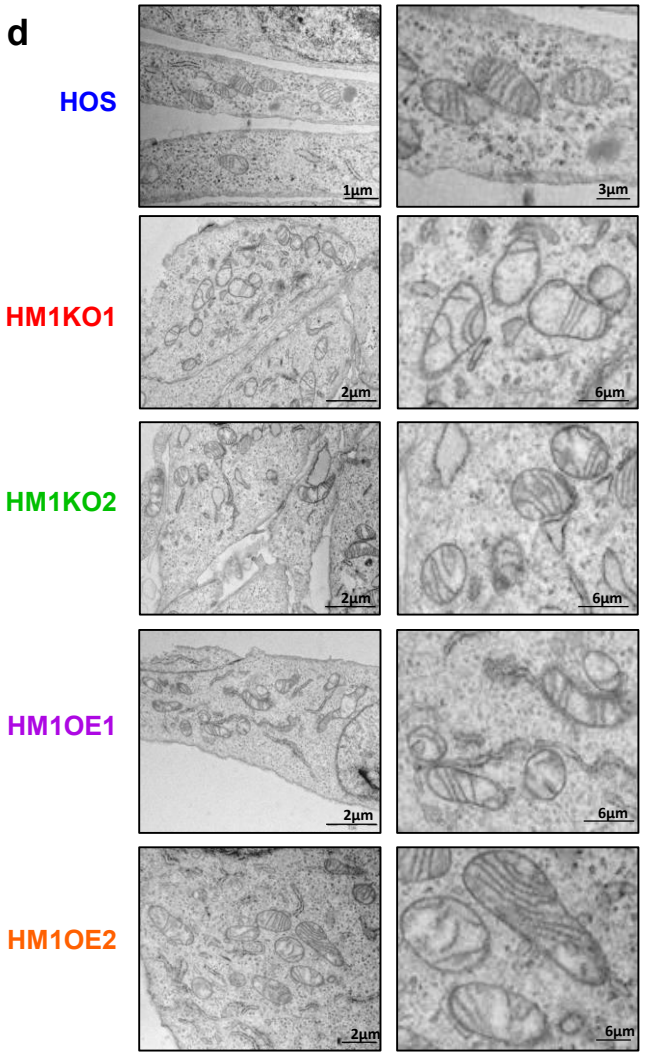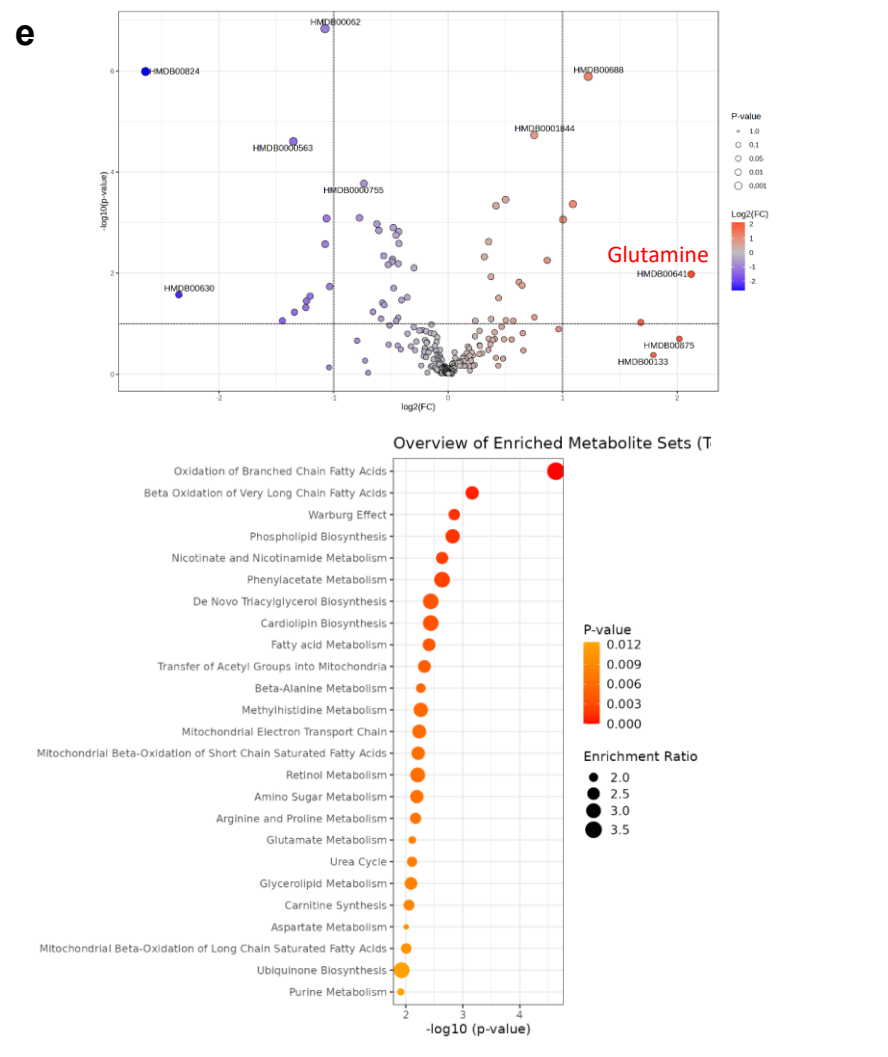

Supplement: Supplementary file 1 [file 7cb2c272ce646a4ab519d96f.pdf]
